## ***Hox*-logic of preadaptations for social insect symbiosis in rove beetles**

Joseph Parker<sup>1\*</sup>, K. Taro Eldredge<sup>2</sup>, Isaiah M. Thomas<sup>3</sup>, Rory Coleman<sup>3</sup> and Steven R. Davis<sup>3,4</sup>

<sup>1</sup>*Division of Biology and Biological Engineering, California Institute of Technology, Pasadena, CA 91125, USA*

<sup>2</sup>*Department of Ecology and Evolutionary Biology, and Division of Entomology, Biodiversity Institute, University of Kansas, Lawrence, KS, USA*

<sup>3</sup>*Department of Genetics and Development, Columbia University, 701 West 168th Street, New York, NY 10032, USA*

<sup>4</sup>*Division of Invertebrate Zoology, American Museum of Natural History, New York, NY 10024, USA*

\*correspondence: [joep@caltech.edu](mailto:joep@caltech.edu)

How symbiotic lifestyles evolve from free-living ecologies is poorly understood. Novel traits mediating symbioses may stem from preadaptations: features of free-living ancestors that predispose taxa to engage in nascent interspecies relationships. In Metazoa's largest family, Staphylinidae (rove beetles), the body plan within the subfamily Aleocharinae is preadaptive for symbioses with social insects. Short elytra expose a pliable abdomen that bears targetable glands for host manipulation or chemical defense. The exposed abdomen has also been convergently refashioned into ant- and termite-mimicking shapes in multiple symbiotic lineages. Here we show how this preadaptive anatomy evolved via novel *Hox* gene functions that remodeled the ancestral coleopteran groundplan. Using the model staphylinid *Dalotia coriaria*, we abolished activities of the five thoracic and abdominal *Hox* genes. We show that elytral shortening is a staphylinid-specific property of the *Hox*-less appendage ground state, which is overridden in the metathorax by *Ultrabithorax* to promote hind wing expansion. In the exposed abdomen, we present evidence that defensive gland development stems from novel combinatorial outputs of the *Abdominal-A* and *Abdominal-B* *Hox* proteins: in the posterior compartment of tergite VI they specify a chemical gland reservoir—an imaginal disc-like invagination of ectodermal secretory cells; in the anterior compartment of tergite VII *Abdominal-A* and *Abdominal-B* specify clusters of classical duct-bearing glands. These distinct gland cell types collectively synthesize a blend of benzoquinone irritants, surfactant esters and alkane solvent—a defensive chemistry, which in symbiotic species has been augmented with specialized volatiles that potently manipulate ant behavior. These results reveal how *Hox*-controlled body axis modifications caused a convergent trend towards evolving symbiosis in the Metazoa.

**Keywords:** *Hox* genes, evolution, development, preadaptations, rove beetles, symbiosis

## Introduction

Symbiotic relationships pervade the natural world, but their evolution from a free-living existence is poorly understood. Explaining how a given symbiosis evolved and took on its precise form rests on explaining how the often intricate traits that mediate the relationship emerged developmentally and evolutionarily. In the Metazoa, numerous parasitic and mutualistic taxa bear specialized anatomical, physiological and neurobiological adaptations for engaging in interspecies interactions. Such multifarious traits are typically idiosyncratic, lineage-specific features: ant-tended nectary organs of lycaenid butterfly caterpillars (1), the sucking disks of remoras (2), or the neural differentiation of host and conspecific chatter by parasitic cowbirds (3). Inferring the origins of such features can be challenging, with many appearing as novelties, or deriving from complex or extreme phenotypic modifications that cloud their evolutionary histories. Preadaptations—genetic or phenotypic attributes that evolved prior to the symbiosis itself (also termed "exaptations": 4)—have proven useful for understanding the evolutionary starting material for functional traits in a variety of symbiotic relationships (5-7). Preadaptive traits may form the basis for rudimentary or facultative symbioses by predisposing interactions to occur between free-living species (so called “primary preadaptations;” 7). Preadaptations may also offer paths of least resistance to subsequent adaptation, biasing phenotypic change to certain preexisting traits as the rudimentary symbiosis evolves in intimacy (“secondary preadaptations”; (7).

One clade that serves as a paradigm for understanding the evolution of animal symbioses are the rove beetles (Staphylinidae), currently recognized as the most species rich family in the Metazoa (>63,000 described species)(8). Most staphylinids are free-living, predatory inhabitants of litter and soil (9, 10), but numerous independent lineages have evolved to live symbiotically inside social insect colonies, in particular those of ants (myrmecophiles) and termites (termitophiles) (11-15). Such taxa appear to behave primarily as social parasites: burdensome colony guests, which probably impose a cost on their hosts through resource exploitation and brood predation (7, 13). The ecologies of these species vary markedly, from opportunistic nest intruders that are attacked when detected by hosts, to socially integrated species that are accepted as apparent nestmates (16-21).

Independent evolutionary origins of staphylinid social parasitism are non-randomly distributed across the family, with most occurring in the Aleocharinae, the largest subfamily of ~16,000 described species (7, 11, 12, 22). The myriad instances of aleocharine myrmecophily and termitophily have been posited to stem from a preadaptive body plan that predisposes free-living species to evolve a socially parasitic lifestyle (7, 23). Like most staphylinids, aleocharines have shortened elytra that expose an elongate, flexible abdomen (Fig 1A, B)—a morphology that permits rapid movement through soil and litter (24-26). To defend the soft, otherwise vulnerable abdomen, aleocharines have evolved an exocrine “tergal” gland, which can be targeted at aggressors by flexing the abdomen (10, 27-29). In most aleocharines, quinones comprise the gland’s active volatile component (28). Quinones function as effective ant deterrents (30), enabling even free-living species to withstand worker ant aggression (31). The tergal gland has consequently been proposed as a primary preadaptation for social insect symbiosis, enabling aleocharines to facultatively enter nests, chemically defending themselves (7).

Tergal glands of myrmecophiles have been shown to produce novel compounds that behaviorally manipulate hosts (17, 32-34), indicating the gland can become a target for selection in species that have evolved beyond a facultative association into obligate social parasites. There has also been widespread evolution of new, specialized abdominal glands in symbiotic species that secrete unidentified chemicals that appease or otherwise influence host behavior (Fig 1C) (7). In many symbiotic groups, the exposed abdomen has itself become a target for selection and remodeled into shapes that mimic host ants or termites (7, 11, 12, 23). Abdominal shape evolution is manifested in the remarkable convergent evolution of the ant-like “myrmecoid” body form of army-ant associated aleocharines, with a narrow waist and bulbous gaster (Fig 1D) (7, 12, 35). Multiple termitophile groups display a “physogastric”, termite-like body shape, where a grotesquely swollen abdomen is produced by post-imaginal growth of the fat body, with extensive intersegmental membrane between segments expanding to accommodate the balloon-like abdominal overgrowth (11, 13) (Fig 1E). The function of host mimicry is unclear, but it is typically seen in socially integrated species and presumably serves to imitate tactile nestmate recognition cues (“Wasmannian mimicry”) (13, 36).

The exposed abdomen and tergal gland of aleocharines appear to have been key to unlocking ant and termite colonies. These features arose via developmental modifications of the trunk and dorsal appendages of a more ancestral beetle body plan. In insects and other arthropods, *Hox* genes confer segmental identities along the anteroposterior body axis (37, 38). Their expression patterns and transcriptional activities underlie major anatomical differences between taxonomic groups (39, 40). Here, we have determined how thoracic and abdominal *Hox* genes specify the aleocharine body plan that has been so conducive to evolving social insect symbiosis. To do this, we exploited the model organism properties of the aleocharine *Dalotia coriaria* Kraatz (= *Atheta coriaria*) (Fig 1B). *Dalotia* is a commercially available rove beetle that is used as an agricultural biological control agent (41, 42). *Dalotia* has life history parameters that make it amenable to laboratory culture (42), including a 12–20 day generation time (depending on temperature and diet), high fecundity, and sexual dimorphism that makes genetic crosses straightforward (43). The species is predatory, but can be cultured on artificial diets (44). Crucially, *Dalotia* is non-symbiotic, with morphology, chemistry and behavior that are generalized and ancestral within Aleocharinae. At a phenotypic level, *Dalotia* thus embodies the “preadaptive groundplan”—the free-living starting conditions—thought to underlie the widespread, convergent evolution of social insect symbiosis in this group of beetles.

## Results

### Potent gene knockdown using larval RNAi in *Dalotia*

We transformed the Green House Rove beetle, *Dalotia coriaria*, into a tractable model in which to explore gene function in staphylinids. We optimized husbandry conditions for *Dalotia* and obtained mRNA from mixed larval, pupal and adult stages. *De novo* transcriptome assembly of Illumina RNAseq reads (45) produced 46,637 isotigs (N50 = 3,091) with 22,602 isotigs  $\geq$  500 bp. Using this transcriptome, we synthesized dsRNAs from template cDNAs of the *Dalotia coriaria white* (*Dcw*) and *vermillion* (*Dcver*) loci, which have been shown to control eye pigmentation in beetles (46, 47). We developed an RNAi protocol based on the systemic larval RNAi method used in *Tribolium* (48-51).

Microinjection of *Dcw* or *Dcver* dsRNA at a range of concentrations into late 3<sup>rd</sup> (final) instar larvae abolished eye coloration in pupae (Fig S1A–C), confirming that systemic RNAi works effectively in *Dalotia*. RNAi has an advantage over gene knockout methods in its utility for temporally controlled knockdown at a specific ontogenetic stage. We therefore used late larval RNAi to explore the functions of *Hox* genes in the formation of *Dalotia*'s imaginal structures, which grow primarily during the prepupal and pupal phases.

### **Reduced growth and morphogenetic stretching underlie elytral shortening in staphylinids**

BLAST searching the *Dalotia* transcriptome recovered a full complement of expressed thoracic and abdominal *Hox* genes, with no evidence of duplications (Fig S1D). We first focused on the role of the three thoracic *Hox* genes, *Sex combs reduced* (*DcScr*), *Antennapedia* (*DcAntp*) and *Ultrabithorax* (*DcUbx*) in sculpting one of the key morphological innovations of staphylinids—the short elytra—posited to be a preadaptation for social insect symbiosis in aleocharines by uncovering the abdominal segments for their subsequent chemical and anatomical elaboration (7, 23).

The beetle elytron is a modified flight wing that has become “exoskeletalized”—strengthened and rigidified via heavy chitin and pigment deposition and by the expression of cuticular proteins (52). In most Coleoptera, the elytra cover approximately the entire abdomen and are similar in size or slightly smaller than the unfolded flight wings (53). However, in *Dalotia*, as is typical for both aleocharines and staphylinids in general, the elytron is only 0.13× as large as the unfolded wing (Fig 2A). The wing is flight-capable and folds underneath the elytron via an efficient, origami-like pattern of folds (54). Short elytra probably underlie Staphylinidae's unparalleled evolutionary radiation, generating a beetle with a body plan flexible enough for undulatory locomotion through substrates (24–26). Developmentally, elytral size reduction in staphylinids could stem from decreased cell proliferation relative to the wing during the prepupal growth phase. It could also arise from a non-growth related morphogenetic difference, as the cells of the wing stretch out and become larger in surface area, as *Drosophila* wings do during eversion (55). To determine the relative contributions of these processes to the elytron-

wing size discrepancy, we measured cell densities in these serially homologous structures. We used pupae rather than adults to estimate cell densities: although each cell of the adult *Dalotia* wing produces a single microtrichium, as in *Drosophila* (Fig 2C), these structures are absent from the differentiated elytron which has only sparse setae (Fig 2B), precluding estimation of elytral cell density. In contrast, in the mature pupa (Fig 2D), cells of both wing and elytron have ceased proliferating and have already secreted chitin, yet remain attached to the cuticle and can be labeled with a nuclear stain to reveal cell densities (Fig 2F, G). At this stage, the elytron has attained its correct final size, but the wing has not started stretching to its full extent, which happens post-eclosion. Cell densities in the pupal wing and elytron show no significant difference (Fig 2F–H), but the elytron is nevertheless approximately half as large as the wing at this stage (Fig 2E). It follows that differences in both growth and morphogenetic stretching account for the reduced elytron size of rove beetles. A reduced relative rate of cell proliferation accounts for the initial halving of elytron size relative to the wing, seen in the pupa (Fig 2D, E). Subsequent non-proliferative, morphogenetic expansion of the wing post-eclosion exaggerates this difference still further in the adult (Fig 2A).

### ***Hox* logic of the staphylinid short elytron**

*Dalotia*'s elytron-wing size discrepancy mirrors a classical paradigm of *Hox* gene function: the transformation of the dipteran hind wing into the haltere. Here, expression of *Ultrabithorax* in the dorsal metathoracic (T3) appendage inhibits growth and morphogenetic stretching to convert the ancestral flight wing into a tiny balancing organ (Fig S2A) (37, 55-58). Elytral size reduction in staphylinids might arise from similar *Hox*-dependent modulation of organ size, but with the size decrease occurring in the mesothoracic (T2) appendage and hence under the influence of a more anterior *Hox* gene. Counter to this idea, however, studies in *Drosophila* and *Tribolium* have shown that the dorsal T2 appendage—the wing or elytron, respectively—arises independently of *Hox* input, since loss of any of the three thoracic *Hox* genes does not impact its development (38, 49). We tested whether the staphylinid elytron also represents the default, *Hox*-free appendage state. Knockdown of *DcUbx* by microinjecting dsRNA into late third instar larvae induced a classical bithorax mutant phenotype in the resulting pupa (Fig 3A, B)

(37). The T3 appendage (the wing) converted to the T2 identity (elytron) (Fig 3A, B), and the scutellum, a T2 structure, was also duplicated in T3 (Fig 3A, B). This result confirms that *DcUbx*'s role is confined to T3, where it blocks elytron exoskeletalization to specify an enlarged, membranous flight wing, as in *Tribolium* (49). Crucially, loss of the two anterior thoracic *Hox* genes, *DcScr* and *DcAntp*, produced analogous results: knockdown of *DcScr* caused the appearance of elytron-like outgrowths from the pronotum (T1), consistent with *Scr*'s role in repressing wing development in the insect prothorax (49, 59), but elytron size and morphology were not detectably affected (Fig 3C, D). Similarly, *DcAntp*-RNAi produced a malformed leg phenotype, without any discernable effect on the elytron (Fig 3C, E). The rove beetle elytron thus appears to represent the developmental “ground state”—the default morphology of the dorsal thoracic appendage, which develops without influence of *Hox* genes.

### ***DcUbx* promotes wing growth via novel downstream target gene regulation**

The mechanism of organ size reduction in the rove beetle elytron differs to that operating in the fly haltere, where ground state size is modified by the growth-repressive function of *Ubx* (60). Rather, the staphylinid elytron shares the *Hox*-free ground state property with the dorsal T2 appendage of most other holometabolan insects (38, 49, 52), but the ground state has itself been intrinsically reprogrammed during evolution so that the elytron attains only a small size. This staphylinid-specific mechanism has consequences for the function of *Ubx* in rove beetles. For the animal to develop enlarged hind wings capable of flight, *Ubx* must act in T3 to override the size reduction inherent to the ground state (Fig 3A, B). Staphylinid *Ubx* has thus evolved to function effectively as a growth-promoting transcription factor—a novel role within the Coleoptera, and one that is opposite to its growth-repressive activity in the dipteran haltere (56-58).

How does *DcUbx* produce a different developmental output to its *Drosophila* ortholog? Radical changes in *Hox* function during evolution have arisen by both *cis*-regulatory changes in enhancers of *Hox* target genes (e.g. 61), and also via evolution of the *Hox* protein sequences themselves, via acquisition of novel transcriptional activation or repression domains (62-64). The opposite effects of *Ubx* in *Dalotia* and *Drosophila* could depend on the species-specific genomic contexts in which the proteins ordinarily



function; conversely, it could stem from each species' divergent Ubx protein sequences, which share only 52% amino acid identity, conferring potentially opposite activities on transcription when bound to common loci. To distinguish between these alternatives, we cloned *DcUbx* for GAL4/UAS-mediated misexpression in *Drosophila*, and compared the effects to expressing *Drosophila Ubx* (*DmUbx*). We used *nubbin-GAL4* to drive transgenes in the blade territory of the wing imaginal disc, temporally restricting GAL4 activity specifically to the third larval instar by using temperature sensitive GAL80 and shifting to the permissive temperature (65). As shown previously (66), expression of *DmUbx* using this method strongly represses growth and causes the blade to transform into a tiny haltere-like structure (Fig S2B, C). Strikingly, *DcUbx* produced a near-identical phenotype in the *Drosophila* wing (Fig S2B, D), indicating that *DmUbx* and *DcUbx* possess the same growth repressive activity when mis-expressed in flies. As an additional test we looked at the impact of the two Ubx proteins on morphogen production. In the haltere, *DmUbx* has been shown to repress growth in part by impeding production of the Decapentaplegic (Dpp) morphogen (57, 58). Expressing *DmUbx* in the Dpp expression domain of the wing reduced the output and range of Dpp, as revealed by phosphorylated MAD (pMAD), and decreased the size of the entire blade (Fig S2E, F). Using this assay, *DcUbx* again behaved similarly (Fig S2E, G). This equivalence of *DmUbx* and *DcUbx* activity in *Drosophila* implies that their opposing phenotypic effects in their native contexts are unlikely to arise from differences in protein sequence. Instead, divergent regulatory evolution downstream of Ubx, in loci tasked with overriding the ground state, accounts for why *DmUbx* produces a diminutive haltere from an enlarged flight wing, while *DcUbx* produces an enlarged flight wing from a diminutive elytron.

### **Ontogeny and chemistry of the tergal gland: an evolutionary key innovation**

By exposing the abdomen, the evolutionary development of short elytra imposed an “Achilles’ heel” on staphylinids, with various subfamilies countering the lack of physical protection by evolving abdominal defense glands (10, 15, 67, 68). In Aleocharinae, evolution of a tergal gland on the dorsal abdomen appears to have had major consequences for the subfamily’s evolutionary success. The vast majority of the >16,000 described species, including *Dalotia*, comprise one clade, the so-called “higher

Aleocharinae”, which is defined by the presence of the tergal gland and occupies a spectrum of niches that is unprecedented within the Coleoptera (10, 22). In contrast, four earlier-diverging tribes that form the remainder of the subfamily lack the gland, and number only ~120 species (22, 28, 69). The glandless outgroup subfamilies Tachyporinae, Trichophyinae, Phloeocharinae and Habrocerinae are similarly species-poor relative to the higher Aleocharinae. Evolution of the tergal gland appears to represent a defensive “key innovation”, which helped catalyze the higher Aleocharinae’s radiation in terrestrial ecosystems.

The developmental changes in the higher aleocharine stem lineage that underlie tergal gland evolution are unknown. Likewise, the gland’s genetic capacity to synthesize defensive compounds, which can vary in a species-specific fashion to adapt the beetles to different habitats, is a mystery. In adult *Dalotia*, as in most other Aleocharinae, the tergal gland appears as a large, sack-like reservoir of transparent, chitinous intersegmental membrane extending from the anterior edge of abdominal tergite 7 (A7) (Fig 4A). The margin of tergite 7 projects outward, forming a sclerotized cuticular shelf (Fig 4A), which regulates the release of the secretion from the reservoir. When filled, the defensive secretion has a yellow color (Fig 4A), and by twisting the abdomen over the body, these contents can be expelled at or smeared on aggressors (7, 30, 67) (Supplemental Video S1). We used gas chromatography-mass spectrometry (GC-MS) to profile *Dalotia*’s tergal gland chemistry, collecting the secretion via three different methods: dabbing filter paper onto the gland opening (Fig 4B, Fig S3A), forcing the beetle to expel the gland contents directly into hexane by briefly submersing it (Fig S3B), and using dynamic headspace collection of volatiles (Fig S3C). All three methods detected similar proportions of the same six compounds: three benzoquinones, responsible for the secretion’s yellow color (1,4-Benzoquinone, 2-Methyl-1,4-benzoquinone, 2-Methoxy-3-methyl-1,4-benzoquinone), two esters (Ethyl decanoate, Isopropyl decanoate) and large amounts of an alkane, *n*-undecane (Fig 4B; Fig SS3). The *n*-undecane functions as the hydrocarbon solvent for the benzoquinones (28), and the esters are probably surfactants, or wetting agents, facilitating the spreading of the secretion across biological tissues (70).

*Dalotia*’s benzoquinone/sulcatone-based secretion matches the quinone/hydrocarbon chemistry of most other free-living aleocharines studied thus far

(28). This general composition likely approximates the primitive tergal gland chemistry within the subfamily—one that has been augmented or substituted with novel compounds in at least some social insect symbiont taxa (33, 34, 71). We explored how the gland forms developmentally. Unlike the wing and elytron, which develop primarily during the prepupal phase and appear fully grown in the pupa, we found the tergal gland reservoir arises later, as an invaginating pocket of dorsal ectoderm during pupation (Fig 4C–E). Using histological sections, we observed the nascent reservoir as a small cluster of cells budding from the epidermis at twenty-four hours after pupal formation (Fig 4C). The reservoir cells subsequently proliferate over the next 48 hours, producing an extensively folded columnar epithelial sack inside the body cavity (Fig 4D, E) (72). Tergal gland reservoir development is akin to the imaginal discs of *Drosophila*, which invaginate from the ectoderm and form an internal sack of epithelial cells that proliferate inside the body cavity (73). Unlike the imaginal discs, however, the gland reservoir never undergoes morphogenetic eversion, remaining invaginated within the abdomen.

### ***Hox* logic of tergal gland development and chemical biosynthesis**

Dissecting open the dorsal adult abdomen exposes the organization and anatomy of the mature gland, revealing a composite structure (Fig 4F, G). The gland reservoir is a bilobed sack that sits directly underneath A6, and associated with it are two symmetrical clusters of large, classical gland units (Fig 4F, G). Each unit is comprised of a globular bulb cell with a large, internal extracellular space, and a duct cell (Fig 4I). These gland units are situated directly posterior to the reservoir in the anterior portion of A7 (Fig 4F, G, I). The cells comprising the reservoir are of a ductless secretory type that has been termed “D2”, while the large, classical gland units have been termed “D1” (28, 67, 72)—a terminology we follow here. The ducts of the D1 clusters feed into the D2 reservoir (28, 67), and based on their enlarged nuclei (Fig S5D, E), the large D1 bulb cells appear to be polyploid. How did this evolutionary novelty form at this specific abdominal position?

Developmental patterning of the adult insect abdomen has been studied in *Drosophila*, where the intersegmental membrane between tergites derives from cells comprising the posterior (P) compartment (74, 75). We speculated that the D2 gland cells that comprise the reservoir, and which are continuous with the A6–A7 intersegmental

membrane, might be of P compartment origin. Staining the adult gland for Engrailed (En) protein, which specifies P compartment identity (76), reveals that all D2 gland cells label strongly and positively for En (Fig 4F–H). The reservoir thus originates from the P compartment of segment A6. In contrast, the D1 gland units sitting behind the reservoir do not label for En (Fig 4H), indicating they likely derive from the anterior (A) compartment cell population of segment A7. We explored a variety of other higher aleocharine species, and found all of them to have a glandular organization similar to that of *Dalotia* (Fig 4J, K, Fig S4A–C). Each species possesses a gland reservoir under segment A6 that was derived from Engrailed-positive posterior compartment cells, together with a varying number of D1 gland units situated directly behind, in A7 (Fig 4J, K, Fig S4A–C). In contrast, *Coproporus* from the closely allied subfamily, Tachyporinae, exhibited no such structure (Fig 4L), and the gland is also known to be absent from the early-diverging aleocharine tribes Gymnusini, Mesoporini and Trichopseniini (69). The gland is thus a morphological and chemical novelty of higher Aleocharinae, which develops in a specific segmental position and with a stereotyped compartmental organization.

We explored the roles actions of the two Hox genes that function in the insect abdomen: *Abdominal A* (*AbdA*) and *Abdominal B* (*AbdB*), using whole-mount cuticle preps of the abdomen to assess regions of segmental specification by the two Hox proteins (Fig S5A–C). RNAi-knockdown of *AbdA* caused a segmental transformation phenotype that extended from segments A3–A5, which transform into a weakly sclerotized segment type similar to A1 and A2, all the way to the posterior margin of A7, which takes on a jagged form, similar to that of A8 (Fig S5A, B). Hence, *AbdA* controls segmental identities at least as far posteriorly as A6 and A7, the gland-bearing segments. Notably, in *AbdA* knockdown animals, the shelf at the anterior margin of A7, which marks the tergal gland opening in wild type animals (Fig S5A), was missing (Fig S5B), and we could also see no clear evidence of a membranous gland reservoir, confirming *AbdA*'s potential role in tergal gland specification. In *AbdB* knockdown animals, all segments, including A7 and A8, assume an identity similar to A3–A6 in wild type animals (Fig S5A, C), and again, no cuticular shelf or membranous reservoir could be

observed. Hence, the morphology of A6 and A7, the gland bearing segments, are specified by a combination of both *AbdA* and *AbdB* acting together.

Exploring the internal abdomen, we found that *AbdA* RNAi completely abolished tergal gland formation, with both the D2 reservoir and D1 gland cells failing to develop (Fig 5A, B). We note also that nuclei of both the D1 and D2 gland cells stain positively for *AbdA* using the antibody FP6.87, with the caveat that the epitope for this antibody is shared with *Ubx*, active more anteriorly (Fig S5D, E). Similarly, *AbdB* RNAi caused total loss of the tergal gland (Fig 5C). We conclude that *AbdA* and *AbdB* function combinatorially and non-redundantly to specify the tergal gland. Loss of either Hox protein prevents gland formation (Fig 5A–C), effectively phenocopying the glandless condition of higher aleocharine sister lineages (Fig 4L). We therefore propose that during evolution of the higher aleocharine stem lineage, *AbdA* and *AbdB* acquired novel functions, which enabled them to act together in a region of overlapping expression in A6 and A7. In these segments, the two Hox proteins synergistically specify the tergal gland, but they do so via distinct outputs in different segmental compartments (Fig 5H). In the P compartment of A6, *AbdA* and *AbdB* produce the epidermal invagination of D2 secretory cells that comprise the tergal gland reservoir. In contrast, in the A compartment of segment A7, *AbdA* and *AbdB* specify the D1 gland cells (Fig 5H).

### **Compartmentalization and modularity of defensive chemical biosynthesis**

As well as being anatomically and developmentally distinct, the D1 and D2 gland cell types have been shown to exhibit major ultrastructural differences in the secretory apparatus through which products are transferred into the reservoir (72). The two cell types thus likely synthesize distinct compounds that contribute to the final, bioactive defensive secretion (28, 72). The *n*-undecane is an alkane that derives from fatty acids, which are reduced to aldehydes and then decarbonylated (28); similarly, the esters likely derive from fatty acid esterification. We determined whether either of the two gland cell types show evidence of fatty acid metabolism by using fluorescently-tagged Streptavidin, which binds to biotin, a coenzyme in the synthesis of fatty acids from Acetyl-CoA (77, 78). Biotin is also involved in the citric acid cycle, but increased cellular labeling of Streptavidin is indicative of an elevated cellular requirement for biotin, and occurs in cell

types involved in fatty acid synthesis such as fat body and oenocytes (79). We observed a strong and specific upregulation of Streptavidin staining in the D2 reservoir cells, as well as in fat body cells (Fig 5D–F), indicating high levels of biotin. In contrast, Streptavidin failed to detectably bind to the D1 gland cells above background levels (Fig 5D–F). The D2 cells thus appear to be a major site of fatty acid metabolism, consistent with their governing the biosynthesis of the alkane and ester portions of *Dalotia*'s glandular secretion. This hypothesis is consistent with the ideas of Araujo and Pasteels, who argued based on electron microscopic evidence that the D2 cells of the aleocharine *Drusilla canaliculata* control synthesis of the hydrocarbon solvent (72). To further verify this notion, we labeled the gland for the transcription factor HNF4, which regulates fatty acid metabolism in both the fat body and oenocytes of insects (79–81). Again, HNF4 antibody labeled the nuclei of the D2 cells and fat body, but was absent from the nuclei of D1 cells (Fig 5G, Fig S4D–I).

We propose that the D2 cells synthesize the solvent and esters by expressing enzymes controlling fatty acid metabolism. In contrast, the benzoquinones are presumably synthesized by the D1 glandular units. Structures closely resembling the D1 units produce quinones in other beetle species (82, 83). Although the enzymatic pathway(s) remain unidentified, they can utilize tyrosine or polyketide precursors (84), which are processed in the gland bulb before being transported along the duct and solubilized in the alkane solvent (82). Araujo and Pasteels (72) presented support for an analogous scenario in *Drusilla*, and Steidle and Dettner for a variety of other aleocharines (28). We thus infer that the D1 glandular units similarly contribute the benzoquinone fraction to *Dalotia*'s defensive secretion. We note that partitioning biosynthetic processes into different gland cell types, all of which feed into a reservoir, enables aleocharines to create a defensive cocktail from compounds that would, in isolation, be of limited functionality. The alkane and esters are not effective deterrents relative to benzoquinones (28), and the benzoquinones would solidify without the alkane solvent. The gland thus displays emergent functionality, whereby the actions of distinct cell types synergize to perform a task not possible by an individual component (85). This biosynthetic partitioning across cell types is programmed ultimately by AbdA and AbdB acting together but via different outputs in abutting P and A compartments (Fig 5H). By

producing distinct gland cell types, modularity in chemical biosynthesis is achieved that likely facilitates the evolvability of the tergal gland secretion, reflected in the diversity of compounds that different species can produce (33, 34, 71).

## **Discussion**

Perhaps no other animal group has been so predisposed to evolve complex interspecies relationships as have the aleocharine rove beetles. The dramatic behavioral, chemical and morphological adaptations of many socially parasitic aleocharine species are reflected in associations with ants and termites that rank among the most intimate symbioses known in the Metazoa (7, 11-14). The repeated evolution of symbiosis has its putative basis in preadaptations that the vast majority of free-living species possess, which predispose these beetles to engage in ecological interactions with social insects (7). Chief among these preadaptations are the short elytra that expose the abdomen, and the concomitant presence of a large, targetable defensive tergal gland near the abdominal tip. By studying *Hox* functions in the free-living aleocharine *Dalotia*, we have uncovered the developmental basis for how this novel preadaptive groundplan evolved within the Coleoptera. These developmental insights provide a foundation for understanding how the anatomy and chemistry of aleocharines has undergone further modification in social insect symbionts.

### ***Hox*-logic of the preadaptive aleocharine groundplan**

We suggest an evolutionary sequence in which Staphylinidae with short elytra and exposed abdomens first evolved from ancestral beetles with long elytra (Fig 6A). This step involved evolutionary changes in the *Hox*-free ground state circuitry in T2, which reduced the size of the elytron, together with corresponding regulatory changes downstream of *Ubx* that blocked this size reduction from happening in the T3 hind wings (Fig 6B). Further evolution of the wing folding mechanism had to occur to facilitate packing of the hind wings underneath the small elytra (54). An exposed, flexible abdomen that is unhindered by overlying elytra consequently arose in Staphylinidae, without sacrificing the beetle's capacity for flight. This same basic body plan organization is shared by the majority of the 63,000 species of rove beetle, and was a

precondition for the evolution of abdominal chemical defense glands in a variety of subfamilies (10, 67, 68). In the 16,000 species of Aleocharinae, chemical defensive capacity was accomplished through the evolutionary development of the tergal gland, which arose along the higher aleocharine stem lineage (Fig 6B). This morphological and chemical innovation originated through the synergistic action of the abdominal Hox proteins, AbdA and AbdB, in abutting P and A compartments of segments A6 and A7 where they specify distinct D1 and D2 glandular structures. These glands appear to synthesize distinct classes of compounds, which become bioactive when mixed in the reservoir, leading to total gland functionality (Fig 5H).

To generate both the D1 and D2 gland types, we propose that AbdA and AbdB were recruited to combinatorially induce expression of secondary transcription factors that execute programs of gland cell specification (Fig 5H). These putative “biosynthetic selectors” are posited to govern the morphogenesis and differentiation of each of the D1 and D2 tergal gland cell types, as well as these cells’ capacities to synthesize different compounds (Fig 5H). Such a scenario is analogous to neuron type specification, where different “terminal selector” transcription factors have been shown to control neuronal properties by driving expression of batteries of target genes involved in neurotransmitter synthesis, secretion and reception (86). The identities of the putative biosynthetic selectors are currently unknown, but we note that the invagination of the D2 reservoir is remarkably imaginal disk-like (Fig 4C–E). Appendage patterning genes may thus have been coopted for D2 development, much as they have been for other novel appendage-like structures in other beetle taxa, such as fighting horns (87). However, RNAi knockdown of two genes with prominent roles in appendage formation in insects, *Distalless* (*Dll*) and *Vestigial* (*Vg*), did not affect tergal gland formation (Fig S6C, D, F) despite inducing the expected appendage phenotypes (Fig S6A, E). Evidently at least these two transcription factors are not gland selector proteins.

We also note that the D2 gland cells share some properties with oenocytes—the abdominal cell type responsible for cuticular hydrocarbon biosynthesis in insects (81, 88). Both the D2 cells and oenocytes are ductless gland cells that originate within the P compartment, and their specification depends on AbdA (89, 90); they are also sites of fatty acid metabolism, with both cell types expressing HNF4 and labeling strongly for



Streptavidin (79, 80). We think it possible that partial recruitment of the oenocyte program, by AbdA and AbdB and putative downstream biosynthetic selectors, may have been involved in D2 cell type evolution, with the fatty acid pathways streamlined to produce an alkane solvent and surfactant esters rather than a variety of cuticular hydrocarbons. The additional requirement for AbdB in D2 specification could explain why the reservoir only forms in the P compartment of segment A6 (Fig 4F), whereas oenocytes occur in P compartments of most abdominal segments (81). Further studies of the transcriptomes of the D1 and D2 cells are needed to identify the factors downstream of AbdA and AbdB that govern the differentiation of these gland cell types and their distinct biosynthetic capabilities. We also cannot presently rule out potential microbial involvement in some key steps in the synthesis of tergal gland secretions—for example, the production of the aromatic ring of the quinones, a covalent modification understood in bacteria but not in animals (84).

### **Modification of the preadaptive groundplan in symbionts Aleocharinae**

Building on the developmental changes that established the preadaptive groundplan of the higher Aleocharinae, multiple lineages have evolved to specialize on ant and termite colonies, adapting in a finite number of ways (7) (Fig 6C–E). One of these ways is by modifying tergal gland chemistry to produce new compounds that more potently affect host behavior (Fig 6C) (33, 34, 71). The genetic architecture of the tergal gland hints at how this “chemical reprogramming” could be achieved, through the transcriptional activity of a putative biosynthetic selector recruiting a new enzyme or enzymatic network into either the D1 or D2 gland cells. Across the Aleocharinae, the same basic tergal gland chemistry, comprised of quinones and hydrocarbon solvent, is relatively invariant, suggesting a core biosynthetic apparatus that is conserved across the majority of the subfamily (28). However, the specific quinones and hydrocarbons can differ markedly between species (28) implying species-specific refinement of tergal gland chemistry, presumably via changes in biosynthetic pathways that confer subtle covalent modifications to different compounds within the defensive mixture. The ability of symbiotic species of *Pella* to synthesize the host ant alarm pheromone sulcatone, in addition to undecane and benzoquinones (33, 71), may reflect a relatively simple modification, perhaps elaborating on preexisting fatty acid or quinone-producing

pathways. In contrast, in species of *Zyras*, there has been a wholesale replacement of the typical hydrocarbon-quinone secretion with multiple terpenes that may mimic ant-tended aphids (34). In this case a more dramatic reprogramming of the underlying biosynthesis must be invoked.

In addition to modifying tergal gland secretions, many symbiotic aleocharine taxa have evolved additional, novel glands besides the tergal gland, typically in other abdominal segments (Fig 6D) (7, 13, 17, 19, 27, 91-93). The compounds produced by any of these glands are unknown, but behavioral observations in a variety of species indicate they function to manipulate or appease host ants and termites. Having already evolved the capacity to develop a complex tergal gland on the abdomen, it is possible that some of these novel glands arose via developmental redeployment of the parts of the tergal gland circuitry in new abdominal positions along the anteroposterior axis, presumably under the control of the AbdA and AbdB Hox proteins—analogueous to tergal gland formation but contingent on a different positional code. Similarly, we have previously suggested that the segmentally repeated, paired glands of genera such as *Lomechusa* and its allies may be modified oenocytes (Fig 1C). Regardless of whether newly evolved glands arose through cooption or modification of preexisting glands or via entirely new circuitry, the exposed abdomen is conducive to gland evolution because it is not masked by elytra. Consequently the aleocharine abdomen has become an important interface between host and beetle—an interface shut off to most other Coleoptera which possess long elytra. This same preadaptation of short elytra and abdominal exposure surely underlies the widespread remodeling in symbiont species of abdominal shape, into forms that mimic host ant and termites (Fig 6C) (7, 11-13, 35). Like the establishment of abdominal glands, evolutionary changes in the sizes and shapes of abdominal segments have presumably been achieved through abdominal *Hox*-modulation of segment and compartment growth along the anteroposterior axis (Fig 1D, E).

While numerous arthropod groups have been able to unlock social insect colonies as a resource, few have done so as effectively and repeatedly as Aleocharinae. Consequently, the subfamily is a unique and powerful system for understanding symbiotic interactions between animals and their evolutionary basis. We have invoked a preadaptive anatomical and chemical groundplan of the higher Aleocharinae as having

been central to the rampant, convergent evolution of social insect symbiosis in this clade. We have studied the initial establishment of the groundplan as a way to understand possible evolutionary starting conditions for symbiosis. Future studies on the molecular and neurobiological modifications to this groundplan seen in social insect symbionts may provide a potential framework for comprehending proximate mechanisms underlying the evolution of Metazoan symbioses.

\*\*\*\*\*

### **Acknowledgements**

We thank Brian Spencer (Applied Bionomics, Canada) for providing *Dalotia*, and Raymond Cloyd (Kansas State University), Graeme Murphy (Ontario Ministry of Food and Agriculture) and Richard Greatrex (Syngenta Bioline, UK) for advice on rearing this species. We are grateful to Gary Struhl (Columbia University) in whose laboratory part of this work was carried out.

## References

1. Hojo MK, Pierce NE, Tsuji K (2015) Lycaenid Caterpillar Secretions Manipulate Attendant Ant Behavior. *Curr Biol* 25(17):2260–2264.
2. Britz R, Johnson GD (2012) Ontogeny and homology of the skeletal elements that form the sucking disc of remoras (Teleostei, Echeneoidei, Echeneidae). *J Morphol* 273(12):1353–1366.
3. Lynch KS, et al. (2017) A neural basis for password-based species recognition in an avian brood parasite. *J Exp Biol* 220(Pt 13):2345–2353.
4. Gould SJ, Vrba ES (1982) Exaptation—a Missing Term in the Science of Form. *Paleobiology* 8(1):4–15.
5. Henrik H, Schiøtt M (2013) Laccase detoxification mediates the nutritional alliance between leaf-cutting ants and fungus-garden symbionts doi:10.1073/pnas.1212709110/-/DCSupplemental.
6. Delaux P-M, et al. (2015) Algal ancestor of land plants was preadapted for symbiosis. *Proc Natl Acad Sci USA* 112(43):13390–13395.
7. Parker J (2016) Myrmecophily in beetles (Coleoptera): evolutionary patterns and biological mechanisms. *Myrmecological News* 22:65–108.
8. Newton AF (2015) Beetles (Coleoptera) of Peru: A Survey of the Families. Staphylinidae Latreille, 1802. *Journal of The Kansas Entomological Society* 88:283–304.
9. Grimaldi DA, Engel MS (2005) *Evolution of the Insects* (Cambridge University Press).
10. Thayer MK (2005) Staphylinidae Latreille, 1802. *Handbuch Der Zoologie/Handbook of Zoology, Vol. IV (Arthropoda: Insecta), Part 38 Coleoptera, Beetles. Volume 1: Morphology and Systematics (Archostemata, Adepnaga, Myxophaga, Polyphaga Partim)*, eds Beutel RG, Leschen RAB (Berlin and New York), pp 296–344.
11. Seevers CH (1957) A Monograph on the Termitophilous Staphylinidae (Coleoptera). *Fieldiana Zoology* 40:1–334.
12. Seevers CH (1965) The systematics, evolution and zoogeography of staphylinid beetles associated with army ants (Coleoptera, Staphylinidae). *Fieldiana Zoology* 47(2):137–351.
13. Kistner DH (1979) *Social and evolutionary significance of social insect symbionts. Social Insects*, ed Hermann HR (Academic Press), pp 339–413.

14. Kistner DH (1982) The Social Insects' Bestiary. *Social Insects*, ed Hermann HR (Academic Press), pp 1–244.
15. Parker J (2017) Staphylinids. *Curr Biol* 27(2):R49–R51.
16. Hölldobler B (1967) Zur Physiologie der Gast-Wirt-Beziehungen (Myrmecophilie) bei Ameisen. I. Das Gastverhältnis der *Atemeles*- und *Lomechusa*-Larven (Col. Staphylinidae) zu *Formica* (Hym. Formicidae)\*. *Z Vergl Physiol* 56(1):1–21.
17. Hölldobler B (1970) Zur Physiologie der Gast-Wirt-Beziehungen (Myrmecophilie) bei Ameisen. II. Das Gastverhältnis des imaginalen *Atemeles pubicollis* Bris. (Col. Staphylinidae) zu *Myrmica* und *Formica* (Hym. Formicidae). *Z Vergl Physiol* 66(2):215–250.
18. Kistner DH, Jacobson HR (1990) Cladistic analysis and taxonomic revision of the ecitophilous tribe Ecitocharini with studies of their behaviour and evolution (Coleoptera, Staphylinidae, Aleocharinae). *Sociobiology* 17(3):333–480.
19. Kistner DH (1993) Cladistic analysis, taxonomic restructuring and revision of the Old World genera formerly classified as Dorylomimini with comments on their evolution and behavior (Coleoptera: Staphylinidae). *Sociobiology* 22:147–383.
20. Danoff-Burg JA (1996) An ethogram of the ant-guest beetle tribe Sceptobiini (Coleoptera: Staphylinidae; Formicidae). *Sociobiology* 27:287–328.
21. Parker J, Grimaldi DA (2014) Specialized Myrmecophily at the Ecological Dawn of Modern Ants. *Curr Biol* 24(20):2428–2434.
22. Yamamoto S, Maruyama M, Parker J (2016) Evidence for social parasitism of early insect societies by Cretaceous rove beetles. *Nat Commun* 7:13658.
23. Seevers CH (1978) A generic and tribal revision of the North American Aleocharinae (Coleoptera: Staphylinidae). *Fieldiana Zoology* 71:i–289.
24. Hammond PM (1979) Wing-folding mechanisms of beetles, with special reference to investigations of adephagan phylogeny (Coleoptera). *Carabid Beetles: Their Evolution, Natural History, and Classification*, eds Erwin TL, Ball GE, Whitehead DR (W. Junk, The Hague), pp 113–180.
25. Newton AF, Thayer MK (1995) Protopselaphinae new subfamily for *Protopselaphus* new genus from Malaysia, with a phylogenetic analysis and review of the Omaliine Group of Staphylinidae including Pselaphidae (Coleoptera). *Biology, Phylogeny, and Classification of Coleoptera: Papers Celebrating the 80th Birthday of Roy A. Crowson.*, eds Pakaluk J, Ślipiński A (Muzeum i Instytut Zoologii PAN, Warszawa), pp 221–320.
26. Hansen M (1997) Evolutionary trends in “staphyliniform” beetles (Coleoptera). *Steenstrupia* 23:43–86.

27. Jordan K (1913) Zur Morphologie und Biologie der myrmecophilen Gattungen *Lomechusa* und *Atemeles* und einiger verwandter Formen. *Zeitschrift für wissenschaftliche Zoologie* 107:346–386.
28. Steidle JLM, Dettner K (1993) Chemistry and morphology of the tergal gland of freeliving adult Aleocharinae (Coleoptera: Staphylinidae) and its phylogenetic significance. *Systematic Entomology* 18(2):149–168.
29. Francke W, Dettner K (2005) Chemical Signalling in Beetles. *Topics in Current Chemistry* 240:85–166.
30. Brand JM, Blum MS, Fales HM, Pasteels JM (1973) The chemistry of the defensive secretion of the beetle, *Drusilla canaliculata*. *Journal of Insect Physiology* 19(2):369–382.
31. Donisthorpe H (1927) *The Guests of British Ants: Their Habits and Life Histories* (London: George Routledge & Sons).
32. Akre RD, Hill WB (1973) Behavior of *Adranes taylori*, a myrmecophilous beetle associated with *Lasius sitkaensis* in the Pacific Northwest (Coleoptera: Pselaphidae; Hymenoptera: Formicidae). *Journal of The Kansas Entomological Society* 46:526–536.
33. Stoeffler M, Maier TS, Tolasch T, Steidle JLM (2007) Foreign-language skills in rove-beetles? Evidence for chemical mimicry of ant alarm pheromones in myrmecophilous *Pella* beetles (Coleoptera: Staphylinidae). *J Chem Ecol* 33(7):1382–1392.
34. Stoeffler M, Boettinger L, Tolasch T, Steidle JLM (2013) The Tergal Gland Secretion of the Two Rare Myrmecophilous Species *Zyras collaris* and *Z. haworthi* (Coleoptera: Staphylinidae) and the Effect on *Lasius fuliginosus*. *Psyche: A Journal of Entomology* 2013:1–5.
35. Maruyama M, Parker J (2017) Deep-Time Convergence in Rove Beetle Symbionts of Army Ants. *Curr Biol*:1–8.
36. Rettenmeyer CW (1970) Insect mimicry. *Annu Rev Entomol* 15:43–74.
37. Lewis EB (1978) A gene complex controlling segmentation in *Drosophila*. *Nature* 276(5688):565–570.
38. Struhl G (1982) Genes controlling segmental specification in the *Drosophila* thorax. *Proc Natl Acad Sci USA* 79(23):7380–7384.
39. Hughes CL, Kaufman TC (2002) Hox genes and the evolution of the arthropod body plan. *Evol Dev* 4(6):459–499.
40. Pearson JC, Lemons D, McGinnis W (2005) Modulating Hox gene functions

during animal body patterning. *Nature Reviews Genetics* 6(12):893–904.

41. Carney VA, Diamond JC, Murphy GD, Marshall D (2002) The potential of *Atheta coriaria* Kraatz (Coleoptera: Staphylinidae), as a biological control agent for use in greenhouse crops. *IOBCWPRS Bulletin* 25:37–40.
42. Echegaray ER, Cloyd RA (2013) Life History Characteristics of the Rove Beetle, *Dalotia coriaria* (Coleoptera: Staphylinidae) under Laboratory Conditions. *Journal of The Kansas Entomological Society* 86(2):145–154.
43. Klimaszewski J, et al. (2007) Records of adventive aleocharine beetles (Coleoptera : Staphylinidae : Aleocharinae) found in Canada. *Canadian Entomologist* 139(1):54–79.
44. BIRKEN EM, Cloyd RA (2007) Food preference of the rove beetle, *Atheta coriaria* Kraatz (Coleoptera: Staphylinidae) under laboratory conditions. *Insect Science* 14(1):53–56.
45. Grabherr MG, et al. (2011) Full-length transcriptome assembly from RNA-Seq data without a reference genome. *Nat Biotechnol* 29(7):644–652.
46. Lorenzen MD, Brown SJ, Denell RE, Beeman RW (2002) Cloning and Characterization of the *Tribolium castaneum* eye-color genes encoding tryptophan oxygenase and kynurenine 3-monooxygenase. *Genetics* 160(1):225–234.
47. Grubbs N, Haas S, Beeman RW, Lorenzen MD (2015) The ABCs of eye color in *Tribolium castaneum*: orthologs of the *Drosophila white*, *scarlet*, and *brown* genes. *Genetics* 199(3):749–759.
48. Tomoyasu Y, Denell RE (2004) Larval RNAi in *Tribolium* (Coleoptera) for analyzing adult development. *Dev Genes Evol* 214(11):575–578.
49. Tomoyasu Y, Wheeler SR, Denell RE (2005) Ultrabithorax is required for membranous wing identity in the beetle *Tribolium castaneum*. *Nature* 433(7026):643–647.
50. Tomoyasu Y, Arakane Y, Kramer KJ, Denell RE (2009) Repeated Co-option of Exoskeleton Formation during Wing-to-Elytron Evolution in Beetles. *Current Biology* 19(24):2057–2065.
51. Linz DM, Clark-Hachtel CM, Borràs-Castells F, Tomoyasu Y (2014) Larval RNA Interference in the Red Flour Beetle, *Tribolium castaneum*. *JoVE* (92):1–8.
52. Tomoyasu Y (2017) *Ultrabithorax* and the evolution of insect forewing/hindwing differentiation. *Curr Opin Insect Sci* 19:8–15.
53. Crowson RA (1981) *The Biology of the Coleoptera* (Academic Press, London).

54. Saito K, Yamamoto S, Maruyama M, Okabe Y (2014) Asymmetric hindwing foldings in rove beetles. *Proceedings of the National Academy of Sciences* 111(46):16349–16352.
55. Roch F, Akam M (2000) Ultrabithorax and the control of cell morphology in *Drosophila* halteres. *Development* 127(1):97–107.
56. Weatherbee SD, Halder G, Kim J, Hudson A, Carroll S (1998) Ultrabithorax regulates genes at several levels of the wing-patterning hierarchy to shape the development of the *Drosophila* haltere. *Genes Dev* 12(10):1474–1482.
57. Crickmore MA, Mann RS (2006) Hox control of organ size by regulation of morphogen production and mobility. *Science* 313(5783):63–68.
58. de Navas LF, Garaulet DL, Sanchez-Herrero E (2006) The Ultrabithorax Hox gene of *Drosophila* controls haltere size by regulating the Dpp pathway. *Development* 133(22):4495–4506.
59. Carroll SB, Weatherbee SD, Langeland JA (1995) Homeotic genes and the regulation and evolution of insect wing number. *Nature* 375(6526):58–61.
60. Crickmore MA, Mann RS (2008) The control of size in animals: insights from selector genes. *Bioessays* 30(9):843–853.
61. Jeong S, Rokas A, Carroll SB (2006) Regulation of Body Pigmentation by the Abdominal-B Hox Protein and Its Gain and Loss in *Drosophila* Evolution. *Cell* 125(7):1387–1399.
62. Ronshaugen M, McGinnis N, McGinnis W (2002) Hox protein mutation and macroevolution of the insect body plan. *Nature* 415(6874):914–917.
63. Galant R, Carroll SB (2002) Evolution of a transcriptional repression domain in an insect Hox protein. *Nature* 415(6874):910–913.
64. Tour E, Hittinger CT, McGinnis W (2005) Evolutionarily conserved domains required for activation and repression functions of the *Drosophila* Hox protein Ultrabithorax. *Development* 132(23):5271–5281.
65. McGuire SE, Le PT, Osborn AJ, Matsumoto K, Davis RL (2003) Spatiotemporal Rescue of Memory Dysfunction in *Drosophila*. *Science* 302(5651):1765–1768.
66. Pavlopoulos A, Akam M (2011) Hox gene Ultrabithorax regulates distinct sets of target genes at successive stages of *Drosophila* haltere morphogenesis. *Proceedings of the National Academy of Sciences* 108(7):2855–2860.
67. Araujo J (1978) Anatomie comparée des systèmes glandulaires de défense chimique des Staphylinidae. *Archives de Biologie* 89:217–250.



68. Dettner K (1993) Defensive secretions and exocrine glands in free-living staphylinid beetles—their bearing on phylogeny (Coleoptera: Staphylinidae). *Biochemical Systematics and Ecology* 21(1):143–162.
69. Ashe JS (2005) Phylogeny of the tachyporine group subfamilies and “basal” lineages of the Aleocharinae (Coleoptera: Staphylinidae) based on larval and adult characteristics. *Systematic Entomology* 30:3–37.
70. Dettner K (1984) Isopropylesters as Wetting Agents From the Defensive Secretion of the Rove Beetle *Coprophilus striatulus* F. (Coleoptera, Staphylinidae). *Insect Biochemistry* 14(4):383–390.
71. Stoeffler M, Tolasch T, Steidle JLM (2011) Three beetles—three concepts. Different defensive strategies of congeneric myrmecophilous beetles. *Behav Ecol Sociobiol* 65(8):1605–1613.
72. Araujo J, Pasteels JM (1985) Ultrastructure de la glande défensive de *Drusilla canaliculata* (Fab.)(Coleoptera, Staphylinidae). *Archives de Biologie* 96:81–99.
73. Held LI Jr (2005) *Imaginal discs: the genetic and cellular logic of pattern formation* (Cambridge University Press).
74. Struhl G, Barbash DA, Lawrence PA (1997) Hedgehog organises the pattern and polarity of epidermal cells in the *Drosophila* abdomen. *Development* 124(11):2143–2154.
75. Kopp A, Duncan I (2002) Anteroposterior Patterning in Adult Abdominal Segments of *Drosophila*. *Developmental Biology* 242(1):15–30.
76. Morata G, Lawrence PA (1975) Control of compartment development by the engrailed gene in *Drosophila*. *Nature* 255(5510):614–617.
77. Wakil SJ, Titchener EB, Gibson DM (1958) Evidence for the Participation of Biotin in the Enzymic Synthesis of Fatty Acids. *Biochim Biophys Acta* 29(1):225–226.
78. Fletcher K, Myant NB (1960) Biotin in the Synthesis of Fatty Acid and Cholesterol by Mammalian Liver. *Nature* 188(4750):585–585.
79. Burns KA, Gutzwiller LM, Tomoyasu Y, Gebelein B (2012) Oenocyte development in the red flour beetle *Tribolium castaneum*. *Dev Genes Evol* 222(2):77–88.
80. Palanker L, Tennessen JM, Lam G, Thummel CS (2009) *Drosophila* HNF4 Regulates Lipid Mobilization and  $\beta$ -Oxidation. *Cell Metabolism* 9(3):228–239.
81. Makki R, Cinnamon E, Gould AP (2014) The Development and Functions of

- Oenocytes. *Annu Rev Entomol* 59(1):405–425.
82. Happ GM (1968) Quinone and hydrocarbon production in the defensive glands of *Eleodes longicollis* and *Tribolium castaneum* (Coleoptera, Tenebrionidae). *Journal of Insect Physiology* 14(12):1821–1837.
  83. Li J, et al. (2013) Odoriferous Defensive Stink Gland Transcriptome to Identify Novel Genes Necessary for Quinone Synthesis in the Red Flour Beetle, *Tribolium castaneum*. *PLoS Genet* 9(7):e1003596–18.
  84. Pankewitz F, Hilker M (2008) Polyketides in insects: ecological role of these widespread chemicals and evolutionary aspects of their biogenesis. *Biological Reviews* 83(2):209–226.
  85. Rajapakse I, Smale S (2017) Emergence of function from coordinated cells in a tissue. *Proceedings of the National Academy of Sciences* 114(7):1462–1467.
  86. Hobert O (2011) Regulation of Terminal Differentiation Programs in the Nervous System. *Annu Rev Cell Dev Biol* 27(1):681–696.
  87. Moczek AP, Rose DJ (2009) Differential recruitment of limb patterning genes during development and diversification of beetle horns. *Proceedings of the National Academy of Sciences* 106(22):8992–8997.
  88. Gutierrez E, Wiggins D, Fielding B, Gould AP (2006) Specialized hepatocyte-like cells regulate *Drosophila* lipid metabolism. *Nature* 445(7125):275–280.
  89. Brodu V, Elstob PR, Gould AP (2002) *abdominal A* specifies one cell type in *Drosophila* by regulating one principal target gene. *Development* 129:2957–2963.
  90. Brodu V, Elstob PR, Gould AP (2004) EGF Receptor Signaling Regulates Pulses of Cell Delamination from the *Drosophila* Ectoderm. *Developmental Cell* 7(6):885–895.
  91. Pasteels JM (1969) Les glandes tégumentaires des staphylins termitophiles. *Insectes Sociaux* 16(1):1–26.
  92. Pasteels JM (1968) Les glandes tégumentaires des staphylins termitophiles (Coleoptera). *Insectes Sociaux* 15(4):337–358.
  93. Hölldobler B, Möglich M, Maschwitz U (1981) Myrmecophilic Relationship of *Pella* (Coleoptera: Staphylinidae) to *Lasius fuliginosus* (Hymenoptera: Formicidae). *Psyche: A Journal of Entomology* 88(3-4):347–374.
  94. Jakob W, et al. (2004) The Trox-2 Hox/ParaHox gene of *Trichoplax* (Placozoa) marks an epithelial boundary. *Dev Genes Evol* 214(4):170–175.
  95. Ronquist F, et al. (2012) MrBayes 3.2: efficient Bayesian phylogenetic inference

and model choice across a large model space. *Syst Biol* 61(3):539–542.

96. Philip BN, Tomoyasu Y (2011) Gene Knockdown Analysis by Double-Stranded RNA Injection. *Molecular Methods for Evolutionary Genetics*, Methods in Molecular Biology. eds Orgogozo V, Rockman MV (Humana Press, Totowa, NJ), pp 471–497.
97. Bischof J, Maeda RK, Hediger M, Karch F, Basler K (2007) An optimized transgenesis system for *Drosophila* using germ-line-specific phiC31 integrases. *Proc Natl Acad Sci USA* 104(9):3312–3317.

## Materials and Methods

### *Dalotia* husbandry

*Dalotia* were donated for this study by Applied Bionomics, Canada. Beetles were kept at room temperature in 3- or 5-cup Rubbermaid boxes with a 0.5-1-inch layer of loose coconut fiber substrate (Eco Earth). The substrate was kept slightly damp by occasional misting of the container. Beetles were fed a 1:1 mixture of oatmeal and poultry-rearing pellets powdered in a coffee grinder. Food was sprinkled into the containers and shaken into the substrate every 2–3 days. Adult beetles reach can high densities in containers and display cannibalism, especially of larvae, so were frequently seeded into new containers to avoid population crashes.

### RNA extraction, RNAseq and transcriptome assembly

#### Identification and phylogenetic analysis of *Dalotia Hox* genes

We used tBLASTN to search the *Dalotia* transcriptome for *Scr*, *Antp*, *Ubx*, *AbdA* and *AbdB* using protein sequences of their *Tribolium* homologs. We recovered clear single orthologs of each protein, and aligned these with sequences from the beetles *Dendroctonus* and *Nicrophorus* and *Tribolium*, and added further ortholog sequences from *Drosophila* and *Apis*. The prototypical *Hox* gene from *Trichoplax adherans*, *Trox-2*, (94) was included as an outgroup. Bayesian analysis was performed in MrBayes 3.2 (95)

#### DsRNA preparation and RNAi knockdown in *Dalotia*

DsRNA was prepared from mixed cDNA from pooled larval and adult animals, and regions of 300-600 bp were amplified using primers with T7 linkers. Fragments were cloned into pCR4-TOPO (Thermofisher). The following primers were used:

DcWhite-RNAiF1 TAA TAC GAC TCA CTA TAG GGC GTC CGG GTG AAT TGT TAG C  
DcWhite-RNAiR1 TAA TAC GAC TCA CTA TAG GGT CAG CAG GGT TGT AAT TAT GCG  
DcVer-RNAiF1 TAA TAC GAC TCA CTA TAG GGG AGA ATG CTC AGT GGC AAC G  
DcVer-RNAiR1 TAA TAC GAC TCA CTA TAG GGC ACC GCG TTT AAC CAA TGC C  
DcScR-RNAiF1 TAA TAC GAC TCA CTA TAG GGC AGC ATC CCT ATG CAA CAC C  
DcScR-RNAiR1 TAA TAC GAC TCA CTA TAG GGA CCA TTC GCA TTC ACT GTA CG  
DcAntP-RNAiF2 TAA TAC GAC TCA CTA TAG GGG ATC CGA ATT CCT GTG GTG G  
DcAntP-RNAiR2 TAA TAC GAC TCA CTA TAG GGG GAA CTC CTT CTC TAG CTC C  
DcUbx-RNAiF1 TAA TAC GAC TCA CTA TAG GGC CTT CTT CAG CTT CAT GCG G  
DcUbx-RNAiR1 TAA TAC GAC TCA CTA TAG GGC GGA GTA AAA GAC GTG TGG C

DcAbdA-RNAiF1 TAA TAC GAC TCA CTA TAG GGC CAA ATT CAT CAT CGA TAG CAT G  
DcAbdA-RNAiR1 TAA TAC GAC TCA CTA TAG GGC TGG GAG CAG GAA TTC AAC G  
DcAbdB-RNAiF2 TAA TAC GAC TCA CTA TAG GGT CTC ATC GTG CCA TCA GAG C  
DcAbdB-RNAiR2 TAA TAC GAC TCA CTA TAG GGG TGA TGA TTA ACA ACG TGG TGC  
DcApA-RNAiF1 TAA TAC GAC TCA CTA TAG GGC GTC TAA CAA CAA TCA CTT GGC  
DcApA-RNAiR1 TAA TAC GAC TCA CTA TAG GGC TAC CGG TGG TAT AGA TGA CG  
DcApB-RNAiF1 TAA TAC GAC TCA CTA TAG GGC GAT CGC TAC TAT CTG CTT GC  
DcApB-RNAiR1 TAA TAC GAC TCA CTA TAG GGG CAT CTG GAT TCT GAT TGA TAG C  
DcDII-RNAiF1 TAA TAC GAC TCA CTA TAG GGC TCA AAG TCG GCG TTC ATC G  
DcDII-RNAiR1 TAA TAC GAC TCA CTA TAG GGC CTC CTT GCA TCA TAT TCT GG  
DcVg-RNAiF1 TAA TAC GAC TCA CTA TAG GGG TGC TGC ACA TCA ATA TGA TAG G  
DcVg-RNAiR1 TAA TAC GAC TCA CTA TAG GGG GTG ATG GTA GTC GTG AAC G

The same primers were subsequently used to make template DNA strands for DsRNA synthesis, by amplifying the fragments that were inserted into the TOPO vector and using the Megascript T7 high yield transcription kit (Thermofisher). DsRNA was typically diluted to a 2× concentration of 4 mg/ml, and then diluted 1:1 in PBS and green food dye following a previously published protocol (96). For microinjections, injection needles were made from capillary tubes using a micropipette puller. Each needle was back-loaded with 2-3  $\mu\text{L}$  of dsRNA solution and then attached to a syringe. *Dalotia* specimens were collected and injected at the late larval stage. Late third instar larvae were collected from populations using an aspirator, and 5-7 animals were placed on a CO<sub>2</sub> gas pad and mounted using a paintbrush onto a strip of double-sided tape on a microscope slide. The slide consisted of two microscope slides attached with double-sided tape, misaligned to create a 1 cm edge. During the injection process, CO<sub>2</sub> was blown over the slide to keep the larvae anaesthetized. Each larva was injected with ~0.5  $\mu\text{L}$  dsRNA solution, until the larval body appeared slightly swollen and green in color due to the food dye. After injection, the larvae were allowed to awaken and walk off the tape. The larvae were then placed into moistened scintillation tubes containing plaster of Paris, in which most animals pupated within 24–48 hours. After ten days, adults or uneclosed pupae were inspected for the mutant phenotype. Larvae that died before pupation or did not pupate by the end of ten days were disregarded.

### **Immunohistochemistry**

Adult beetles were immersed in PBS and abdomens were removed with forceps. The ventral segments were removed by cutting around the abdominal margin with dissection

scissors. The dorsal abdomen was fixed in 4% paraformaldehyde (25 minutes, room temperature), washed in PBS+0.02% Triton X100, and stained with the following antibodies: anti-Engrailed 4D9 (1:5; DSHB), anti-*Tribolium* HNF4 (1:500; B. Gebelein), Anti-AbdA/Ubx FP6.87 (1:10; DSHB). Alexa-Fluor secondary antibodies (Thermofisher) were used, along with Alexa-647-Phalloidin (Thermofisher) to label muscles, Alexa-647-Streptavidin (Thermofisher) to reveal biotin, and Hoechst to mark nuclei. Tergal glands were imaged in whole mount dorsal abdomens in Vectashield (Vectorlabs), using a Leica SP5 microscope.

### **Gland Histology**

Pupae were staged to 24-hour intervals, freshly killed and fixed in 24% glutaraldehyde for 1 day. Specimens were then dehydrated through a dilution series to 100% EtOH. Infiltration into LR White epoxy proceeded through a dilution series of 100% EtOH:LR White mixture, allowing tissues to incubate in pure LR White for ~12 hours. Embedding proceeded by placing specimens in gelatin capsules filled to the top with LR White and then in an oven for 24 hours at 60 °C (thermal curing). Embedded specimens were sectioned using a Leica EM UC6 ultramicrotome and diamond knife, producing sections 5-6  $\mu\text{m}$  thick. Sections were stained with toluidine blue. Specimens embedded in Spurr's Resin were dehydrated in an Acetone series prior to infiltration and embedding. Sections were imaged on a Zeiss Axioplan 2 microscope.

### **Construction of *UAS-DcUbx* and *UAS-DmUbx***

A full length *DcUbx* coding sequence was amplified from *Dalotia* larval and adult mixed cDNA using primers designed using the *DcUbx* sequence recovered from the transcriptome. A full length *DmUbx* coding sequence was also obtained (gift from R. Mann). A 3xHA tag was placed at the N-terminus of both coding sequences, and the constructs were ligated into pUAS-ATTB (97) using KpnI and XbaI linkers. *UAS-3xHA-DcUbx* and *UAS-3xHA-DmUbx* were then inserted into the same chromosomal location in *Drosophila*, at 27C2 using phiC31 integrase-mediated recombination (97).

### ***Drosophila* genetics**

A stock containing *Nubbin-GAL4* and *GAL80<sup>ts</sup>* transgenes was crossed to *UAS-DcUbx* or *UAS-DmUbx* flies. After a 24 hour collection, larvae were transferred to 18°C and maintained at low densities to prevent crowding affecting wing size. At the start of the third instar, larvae were transferred to 29°C to permit GAL4-driven *Ubx* expression in the wing blade. Adult wings were dissected and mounted in Hoyer's medium, and imaged with a Zeiss compound microscope. To assess the affects of to *UAS-DcUbx* or *UAS-DmUbx* on Dpp production, *dpp-GAL4* was used to drive *UAS-Ubx* transgenes in the Dpp expression domain of the wing imaginal disc. Late third instar discs were dissected and fixed in 4% paraformaldehyde, and guinea pig phospho-MAD antibody (1:1000; E. Laufer) was used to assess the range of Dpp transduction.

### **Gas chromatography/Mass spectroscopy of tergal gland contents**

Three methods were used to investigate the composition of the tergal gland secretion:

- i) Submersion of the beetles in hexane for 1 minute: gland exudate extraction was accomplished by submersing four living individuals in 50 µl hexane; after 1 minutes the solvent was separated from the beetles.
- ii) Pressing filter paper against the gland opening and subsequent extraction of the filter paper in 50 µl hexane. Additionally, filter paper without gland exudates was extracted as a control.
- iii) Dynamic headspace sampling of the beetle gland secretions. Groups of four beetles were placed in a glass vial and sealed with a lid. The lid was pierced with a glass tube (13mm; ID 5mm) filled with a mixture (1:1) of 3 mg Tenax-TA (mesh 60–80; Supelco, Bellefonte, Pennsylvania, USA) and 3 mg Carbotrap B (mesh 20–40, Supelco, Bellefonte, Pennsylvania, USA), and used as adsorbent tubes. The adsorbent was fixed in the tubes with glass wool. To stimulate the release of gland secretion, beetles were gently stirred with a small magnetic stick on a magnetic stirrer for 20 minutes and the headspace was continuously sampled using a Tuff™ pump system (Casella, Bedford, UK) with a

flow rate of 80 ml/min. Simultaneous collection of the surrounding air was performed to distinguish ambient contaminants. Afterwards, adsorbent tubes were extracted with 50  $\mu$ l hexane.

A GCMS-QP2010 Ultra gas-chromatography mass-spectrometry system (Shimadzu, Duisburg, Germany) equipped with a ZB-5MS fused silica capillary column (30 m x 0.25 mm ID,  $d_f = 0.25 \mu\text{m}$ ) from Phenomenex (Aschaffenburg, Germany). Crude hexane sample aliquots (2 to 5  $\mu$ l) were injected by using an AOC-20i autosampler system from Shimadzu, Duisburg, Germany into a PTV-split/splitless-injector (optic 4, ATAS GL, Eindhoven, Netherlands), which operated in splitless-mode. Injection-temperature was programmed from an initial 40°C up to 230°C and then an isothermal hold for 13 minutes. Hydrogen was used as the carrier-gas with a constant flow rate of 3.05 ml/min. The chromatographic conditions were as follows: The initial column temperature was 50°C with a 1 minute hold after which the temperature was increased 25°C/min to a final temperature of 300°C and held for 2 minutes. Electron impact ionization spectra were recorded at 70 eV ion source voltage, with a scan rate of 0.3 scans/sec from  $m/z$  40 to 400. The ion source of the mass spectrometer and the transfer line were kept at 250°C. Compounds were identified based on their  $m/z$  fragmentation patterns. Additionally the identity was confirmed by comparison of retention indices and MS data with published literature (Dettner 1984, Dettner et al. 1985, Steidle and Dettner 1993), additionally library comparisons with Wiley Registry of Mass Spectral Data 2009 and NIST 2011 were performed.



## Figure Legends

**Figure 1. Social insect symbiosis in Aleocharinae.** Aleocharine rove beetles are a model clade for the evolution of complex symbioses. **A:** Free living aleocharines with generalized morphology: *Gymnusa* (Gymnusini), *Hoplandria* (Hoplandriini), *Oxyopoda* (Oxyopodini), *Atheta* (Athetini), *Drusilla* (Lomechusini). **B:** The model aleocharine *Dalotia coriaria* Kraatz (the Greenhouse rove beetle): left, adult and larva feeding on a fly larval right, adult habitus. **C:** *Lomechusoides* myrmecophile with abdominal glands for host ant manipulation; credit: M. Smirnov (*Myrmica* ant feeding on secretion of a related *Lomechusa* beetle in Japan is shown below; Credit: T. Shimada). **D:** *Pseudomimeciton* myrmecophile with ant-like “myrmecoid” morphology (below, two living beetles walk with *Labidus* host army ants in Peru; Credit: T. Shimada). **E:** *Thyreoxenus* termitophile with termite-like “physogastric” morphology (below, *Thyreoxenus* beetle pictured with *Nasutitermes* host termite; Credit: T. Komatsu). **F:** Convergent evolution of myrmecoid syndrome in Aleocharinae: orange clades are independent origins of myrmecoid beetles, each obligately symbiotic with a different army ant genus (ants shown along the top). Representative aleocharines with generalized, ancestral morphology are shown along the bottom. The position of *Dalotia* within this convergent system is indicated, emphasizing its possession of the free-living groundplan in Aleocharinae, which has been preadaptive for repeatedly evolving social insect symbiosis. Phylogeny modified from Maruyama and Parker (35).

**Figure 2. Differential growth and morphogenetic stretching underlie elytron-wing size discrepancy in rove beetles.** **A:** The *Dalotia* elytron is 0.13× as large as the flight wing. **B, C:** The elytron has sparse, large setae (B), while the wing has microtrichia, each the product of a single wing cell (C). **D:** *Dalotia* pupa, ventral side, showing large flight wings (false colored in green) cloaking the body. **E:** Confocal image of cuticle autofluorescence (green) of partial *Dalotia* pupa in dorsal view, showing elytron and partially unfurled flight wing underneath, which is ~1.8× larger than the elytron at this stage. **F, G:** Confocal autofluorescence (green) and Hoechst-stained nuclei (blue) in a sector of the pupal elytron (F) and flight wing (G), showing similar cell densities in these appendages. Note that in the pupa, cells in both elytron and wing produce a

microtrichium (also visible in E). **H:** Quantification of nuclear densities in elytron and wing. Error bars are S.E.M.; n.s. = not significant in a students *t*-test.

**Figure 3. The elytron develops as a *Hox*-free appendage in rove beetles.** **A:** Wild type pupa showing T2 elytron and T3 flight wing; inset shows dorsal scutellum (Sc) on segment T2 and metanotum (Mtn) on T3. **B:** *DcUbx* RNAi pupa showing the elytron and scutellum are now duplicated in T3. **C:** Wild type adult pronotum, elytron and T1 leg. **D:** *DcScr* RNAi causes elytron-like outgrowths from the edges of the pronotum, but leaves the elytron and T1 legs largely unaffected. **E:** *DcAntp* RNAi causes a malformed leg phenotype but leaves the pronotum and elytron unaffected (note that two different DsRNAs targeting different regions of the *DcAntp* transcript independently reproduced this same phenotype).

**Figure 4. Ontogeny and defensive chemistry of the *Dalotia* tergal gland.** **A:** Removal of abdominal segment A7 reveals *Dalotia*'s tergal gland reservoir: a thin bilobed sack of intersegmental membrane that contains yellow benzoquinones when filled. The anterior margin of tergite 7 is fashioned into a shelf that seals off the gland opening. **B:** GC-MS of the *Dalotia* tergal gland, with compounds corresponding to peaks listed. Asterisks denote contaminant compounds from tissue paper dabbed on the tergal gland opening; these are absent when other methods of chemical extraction are used (See Supplemental Fig S3). **C–E:** Sagittal histological sections of *Dalotia* pupae from 24–96 hours after puparium formation, showing the timecourse of gland development from a small invagination of cells budding from the dorsal epidermis (C), to a large folded epithelial sack (E). **F:** Confocal image of the dorsal internal adult abdomen of *Dalotia*, labeled for En protein (red), Phalloidin-stained muscle (blue) and autofluorescence (AutoF; green). The tergal gland is prominent and sits directly underneath segments A6 and A7. The gland consists of a large, bilobed reservoir comprised of En-positive D2 secretory cells, and two clusters of large, En-negative D1 gland units. **G, H:** Enlarged region of F showing tergal gland organization; boxed region is shown further enlarged in I. En protein staining (red) shows that the D2 reservoir cells express En, and hence are of P-compartment origin from segment A6; The D1 gland unit cells do not express En, and are likely derived from the A-compartment of segment A7. **I:** The D1 gland units are a classical gland type consisting of a large bulb attached to a duct, which feeds into the reservoir (67). **J–L:**

Confocal image of the dorsal internal adult abdomen of three other staphylinids, labeled for En protein (red), Phalloidin-stained muscle (blue) and autofluorescence (green). The two aleocharines *Thamiaraea* (J) and *Gyrophæna* (K) possess a tergal gland; in contrast, *Coproporus*, of the outgroup subfamily Tachyporinae, is glandless (L).

**Figure 5. *Hox*-specification of distinct gland cell types in P and A compartments confers modularity in defensive compound biosynthesis.**

**A–C:** Confocal images of the dorsal internal adult abdomen of *Dalotia*, labeled for En protein (red), Phalloidin-stained muscle (blue) and autofluorescence (green). **A:** Wild type abdomen. **B:** *DcAbdA* RNAi blocks tergal gland development, with D1 gland units and D2 reservoir missing. **C:** *DcAbdB* RNAi similarly inhibits tergal gland formation. **D–F:** Adult *Dalotia* abdomen labeled for En protein (red), Streptavidin (SA; blue in D, magenta in separated channel in F) and autofluorescence (AutoF; green). The D1 gland unit clusters are indicated with a dashed line in all panels. the D2 cells stain strongly for Streptavidin, but the D1 cells do not (most clear in F). Residual fat body cells attached to the D1 and D2 tissues are also Streptavidin-positive. **G:** HNF4 stains nuclei of D2 reservoir cells but not D1 gland unit nuclei; note that the red spots in D1 gland units are not nuclei, but non-specific secondary antibody accumulation in the bulbs of D1 gland cells. **H:** Model for *Hox*-logic of tergal gland development and defensive compound biosynthesis. Domains of influence of proteins *DcAbdA* and *DcAbdB* are indicated, with a region of overlap that includes the P compartment of segment A6 and A compartment of segment A7. We posit that *DcAbdA* and *DcAbdB* act combinatorially to specify different gland cell types in the A6 P compartment and A7 A compartment by acting via distinct intermediate “biosynthetic selector” proteins—transcription factors that govern expression of batteries of different downstream biosynthetic enzymes. In the A6 P compartment *DcAbdA*+*AbdB* act via a D2 gland cell selector to specify the D2 reservoir invagination, and expression in D2 cells of enzymes controlling fatty acid metabolism that permit biosynthesis of the alkane solvent and surfactant esters. In the A7 A compartment, *DcAbdA*+*AbdB* act via a D1 gland cell selector to specify D1 gland units, which presumably delaminate from the ectoderm, and their enzymatic capacity to synthesize benzoquinones.

**Figure 6. Novel *Hox* functions in the evolution of the aleocharine body plan.**

**A:** Aleocharine staphylinids evolved within the Coleoptera suborder Polyphaga, from

ancestors with long elytra (the scirtid *Cyphon*, a basal polyphagan, is depicted). The beetle elytron (blue) develops in the mesothoracic segment (T2) without *Hox* input, and is heavily sclerotized compared to the membranous forewings of other insects. In T3, *Ubx* overrides both the beetle-specific elytron program, creating membranous wings (49). In staphylinids (B), the elytron circuit has been further modified so the appendage attains only a small size, giving the family's trademark short elytra; concomitant changes in target genes downstream of *Ubx* in T3 block both the Coleoptera-specific sclerotization program and staphylinid-specific size reduction program, creating enlarged, flight-capable hind wings. Short elytral expose the abdomen, and in higher Aleocharinae, a quinone-based defensive tergal gland (yellow) is specified by the two abdominal Hox proteins, AbdA and AbdB, acting combinatorially in segments A6 and A7. **C–E:** The higher aleocharine body plan, with targetable chemical defense capacity, confers efficient protection from ants and termites, promoting facultative exploitation of colonies. Fully symbiotic species have further modified this preadaptive groundplan by: (C) reprogramming tergal gland biosynthesis to produce compounds for host behavioral manipulation; (D) adding further novel, targetable glands in new abdominal positions for host manipulation; (E) evolving host-mimicking body shapes, in large part by developmental remodeling of the exposed abdomen.

### **Supplemental Figure legends.**

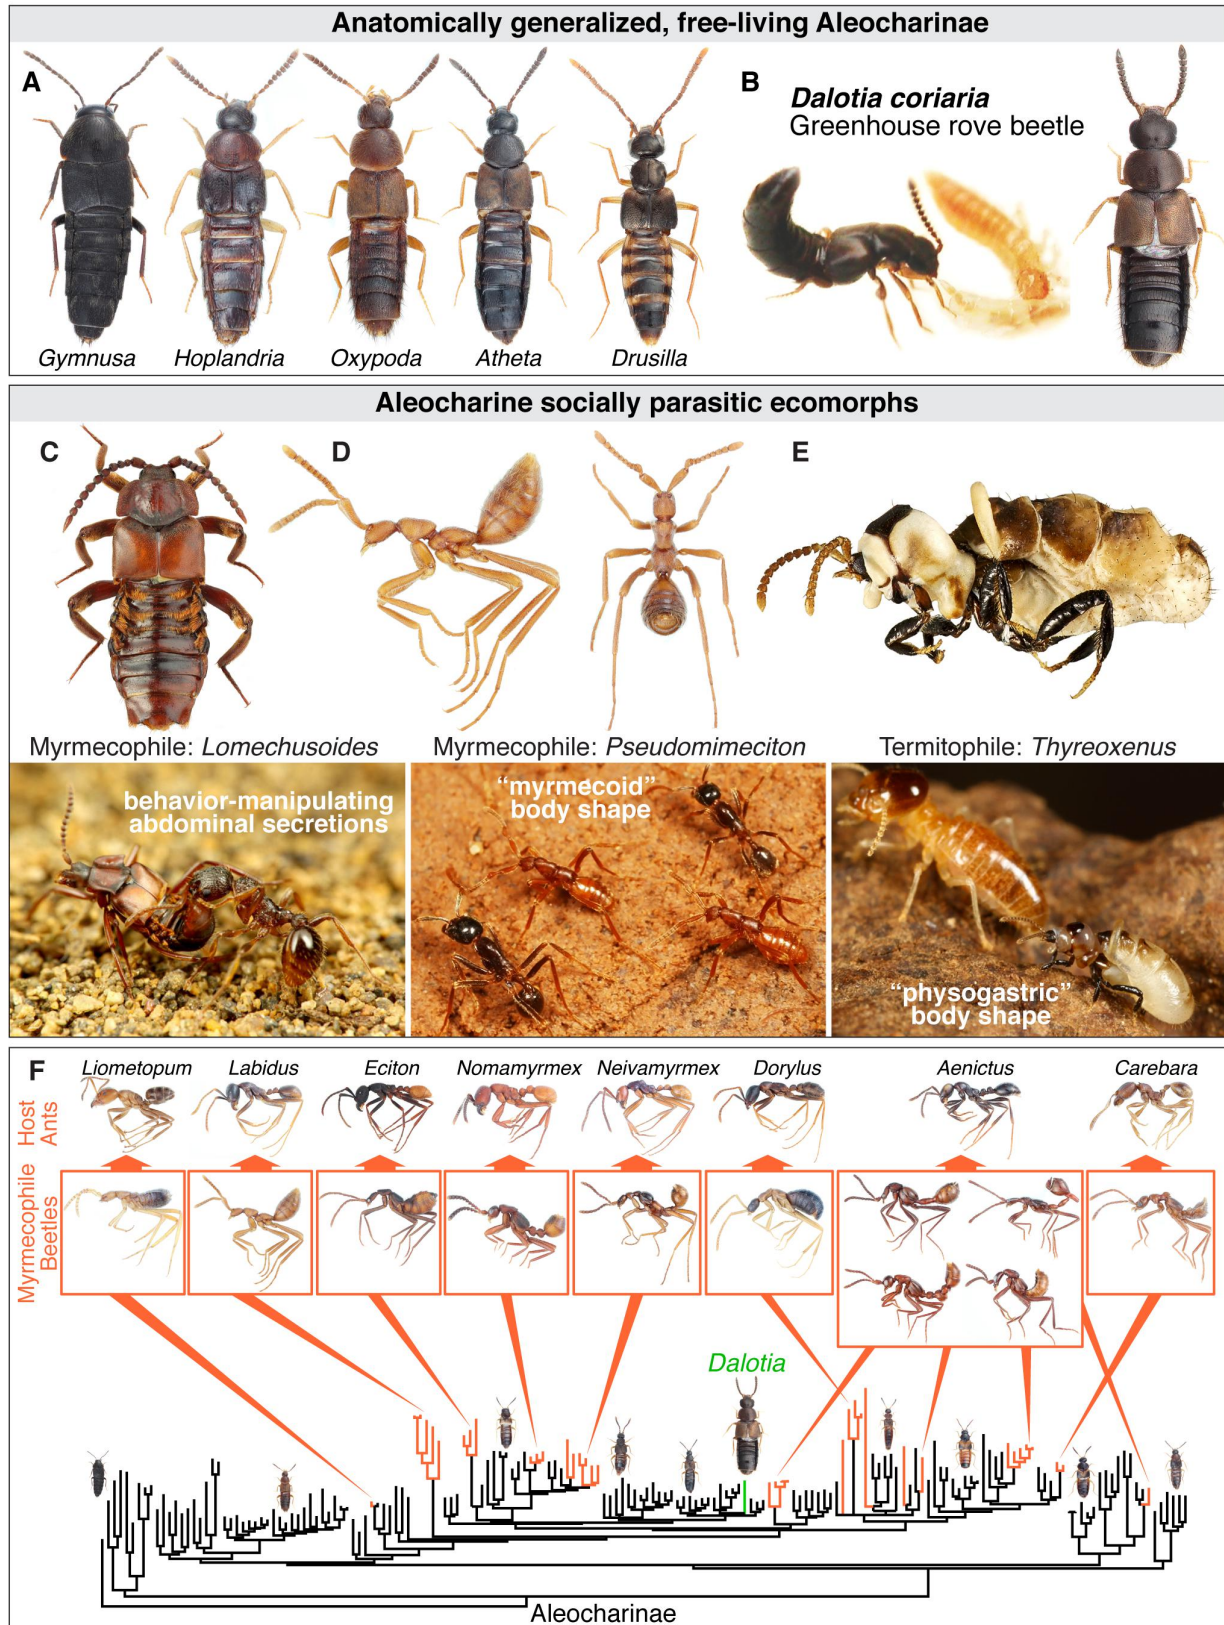

Parker *et al* Figure 1

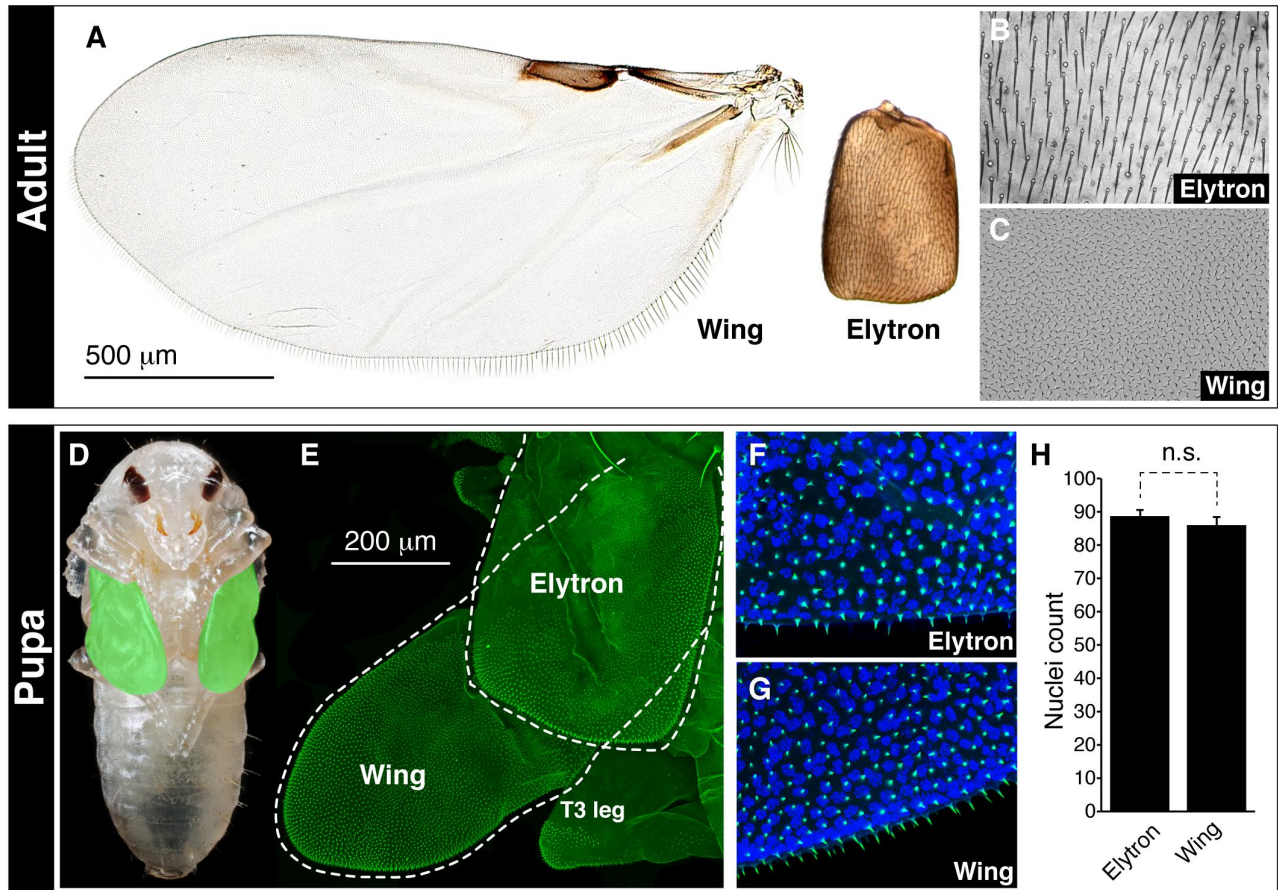

Parker *et al* Figure 2

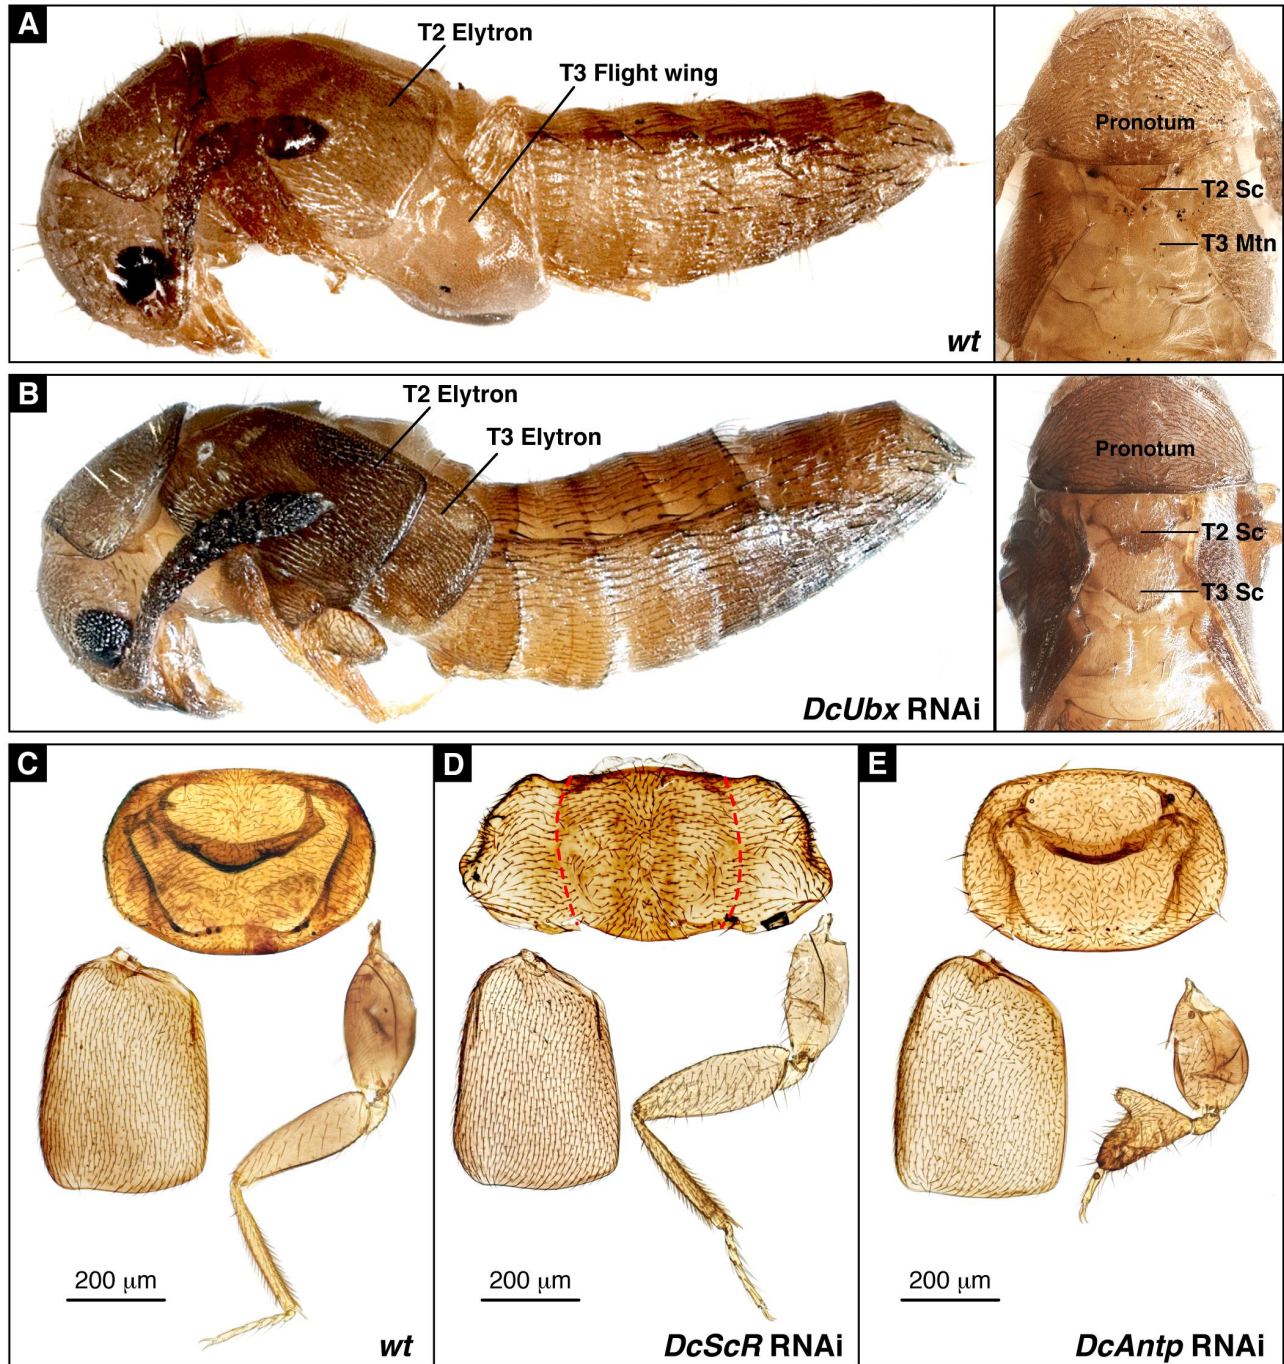

Parker *et al* Figure 3

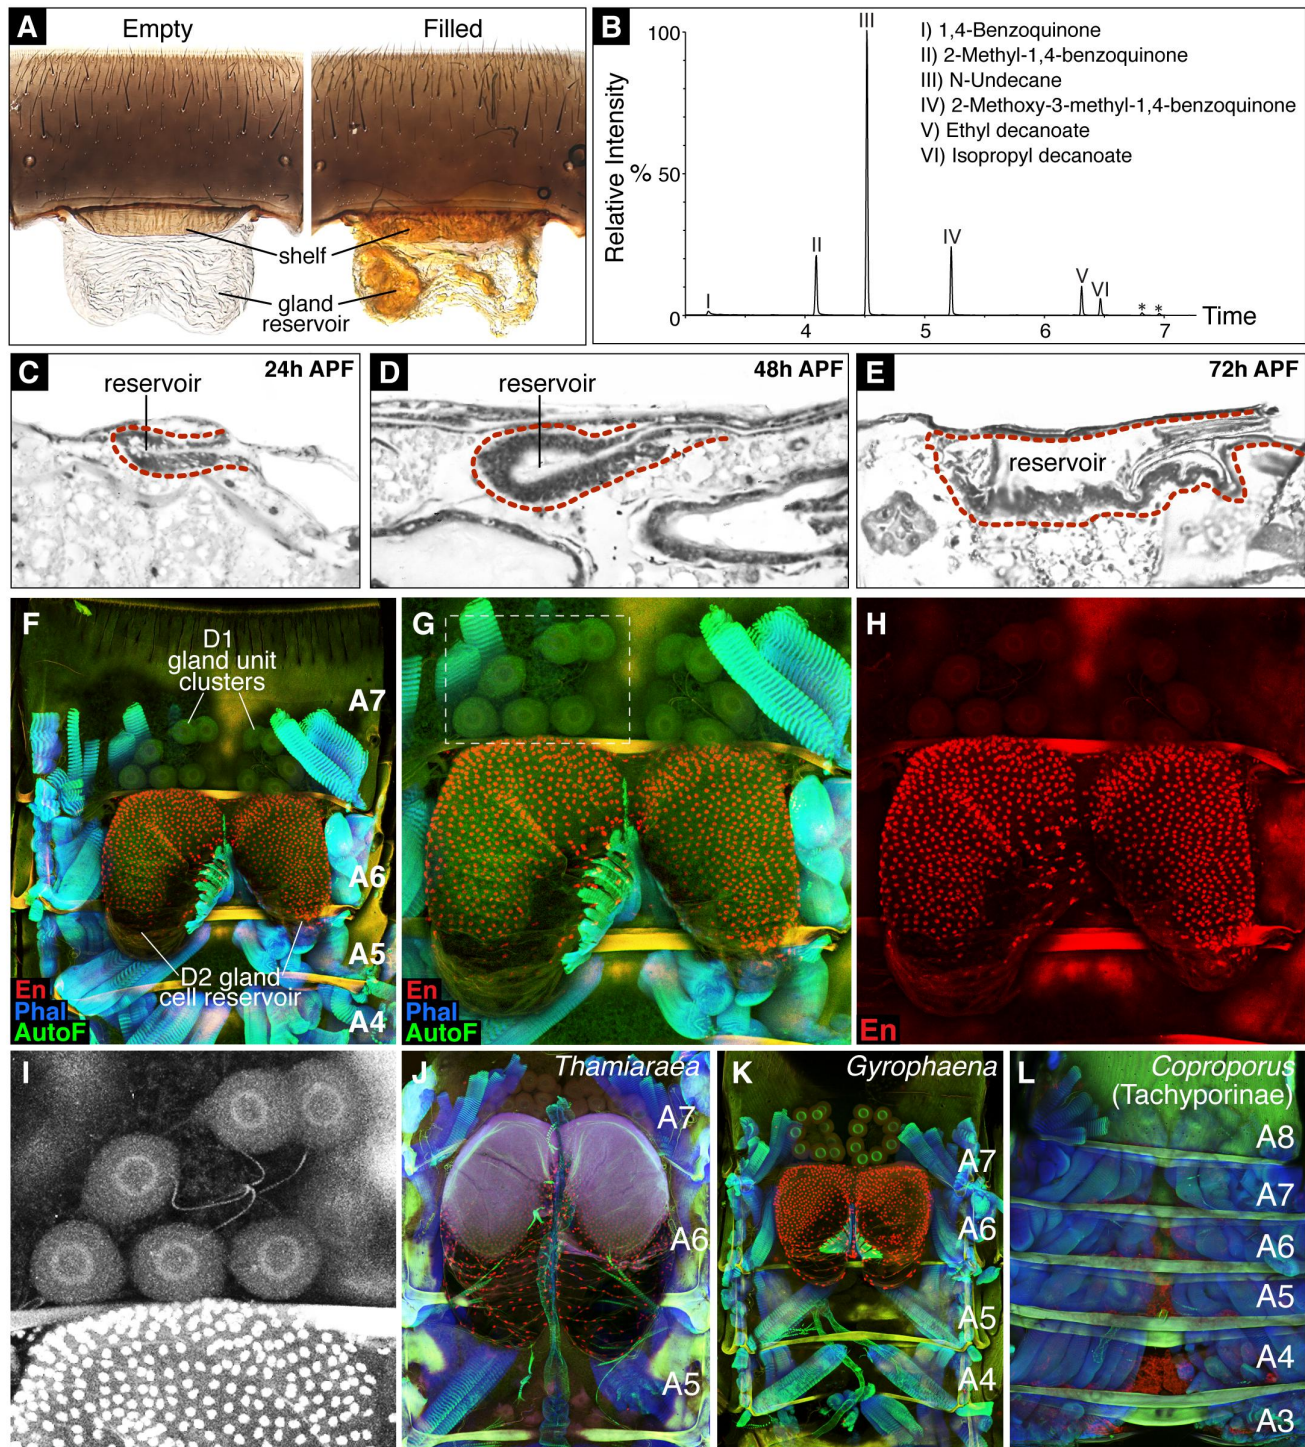

Parker *et al* Figure 4



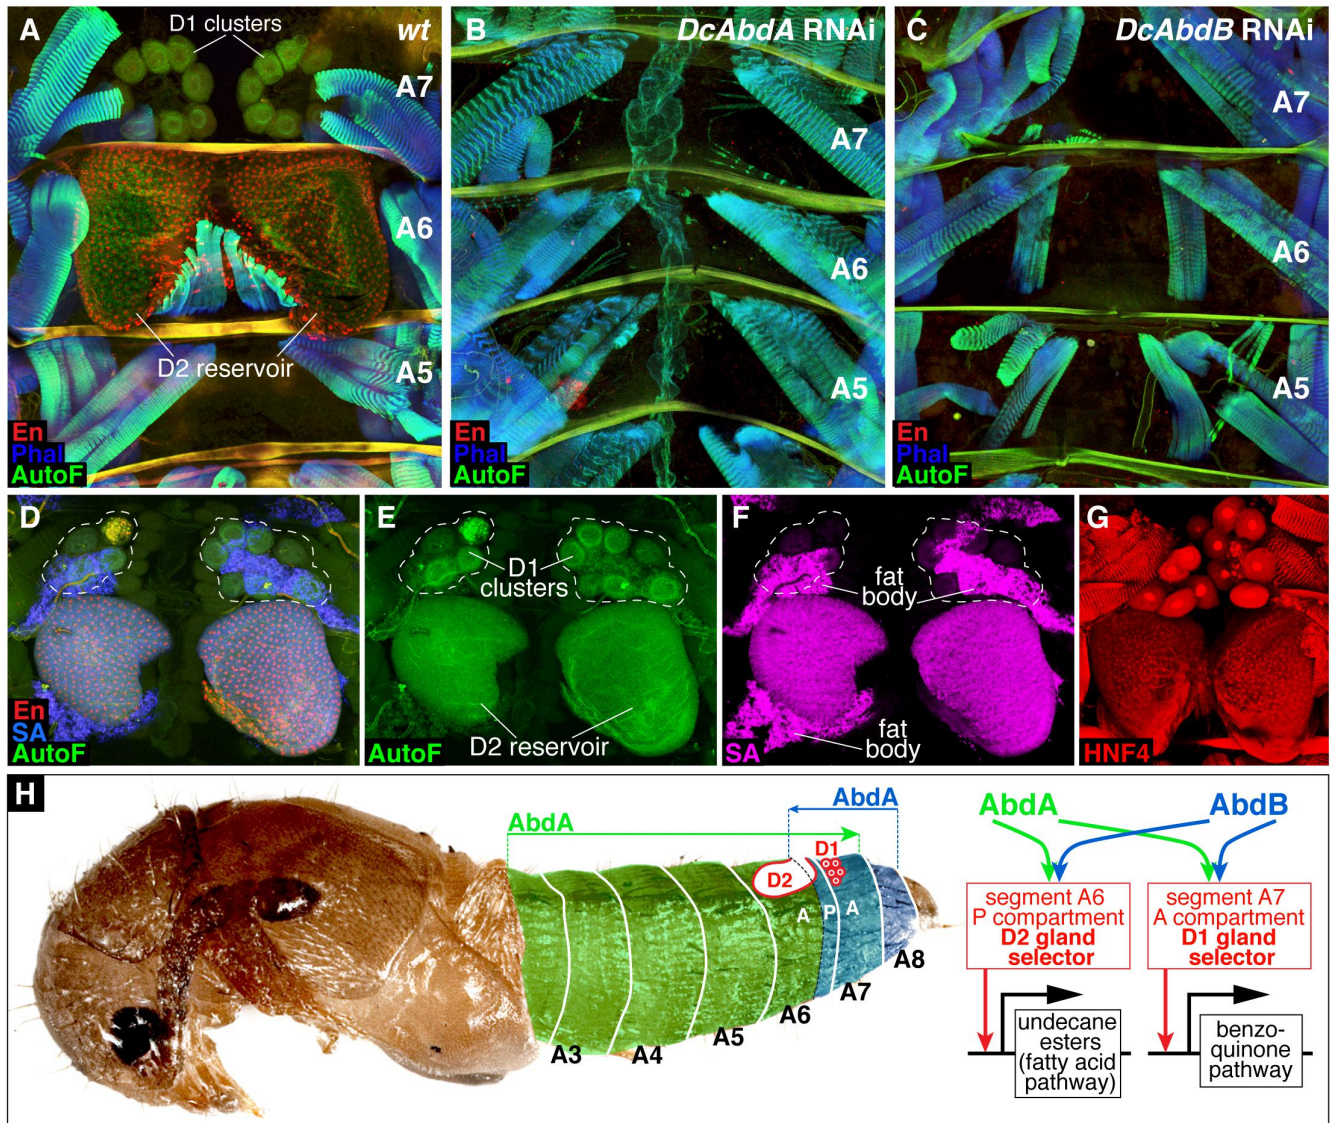

Parker *et al* Figure 5

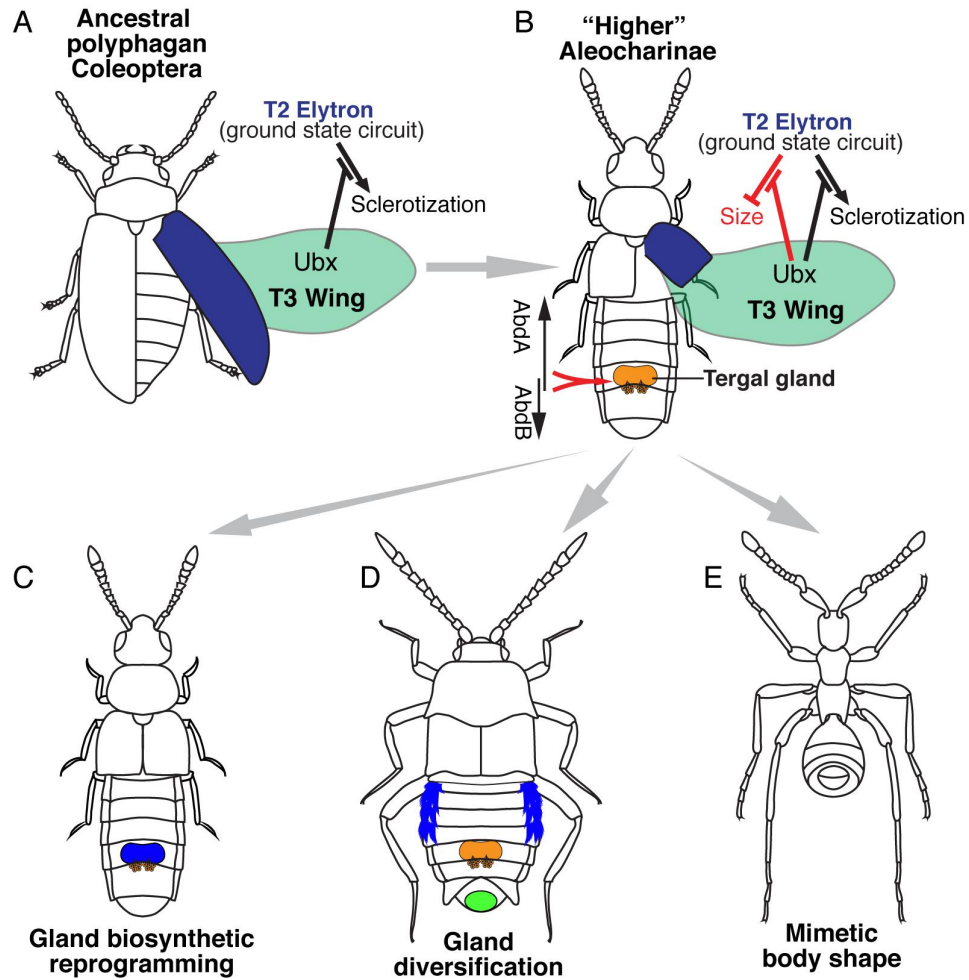

Parker *et al* Figure 6

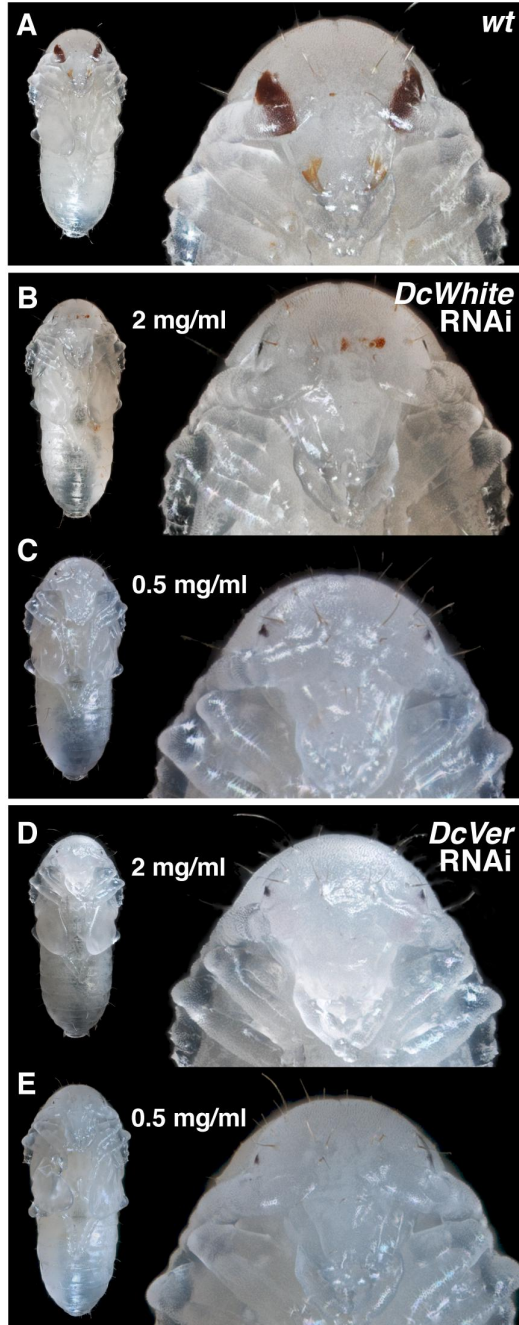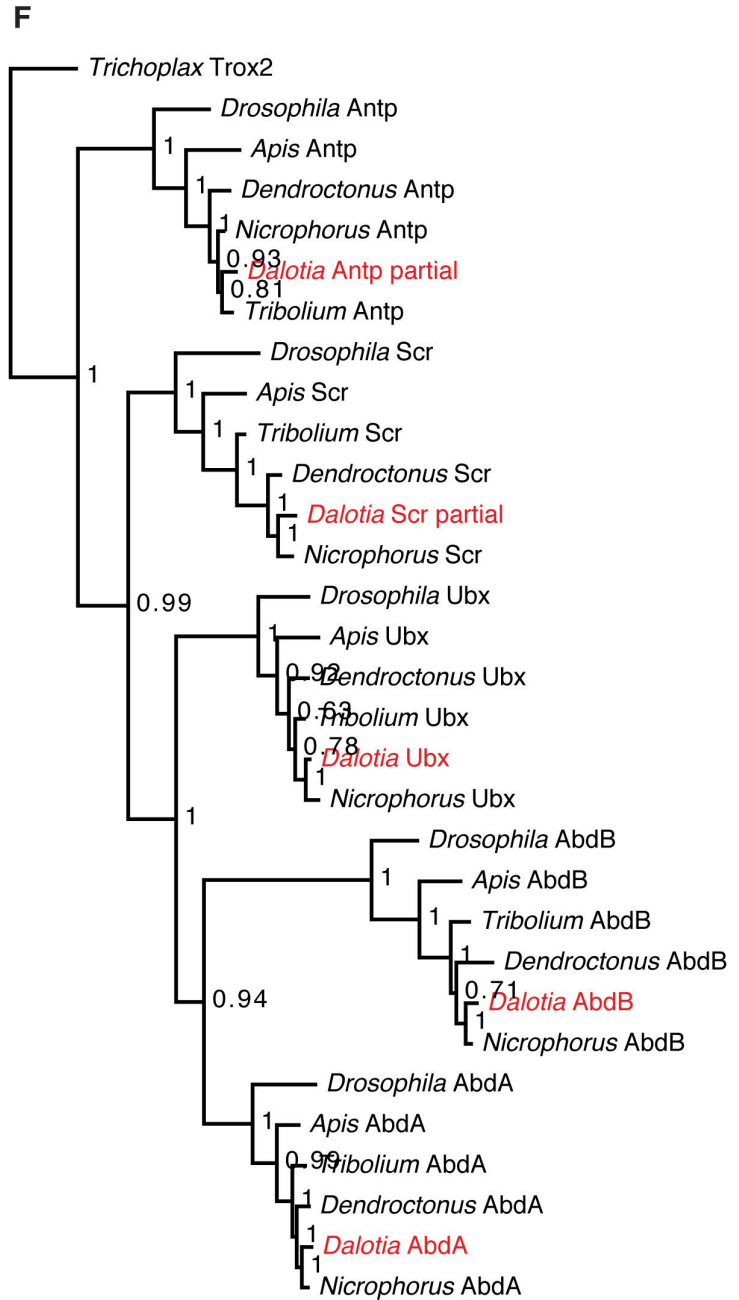

Parker *et al* Supplemental Figure S1

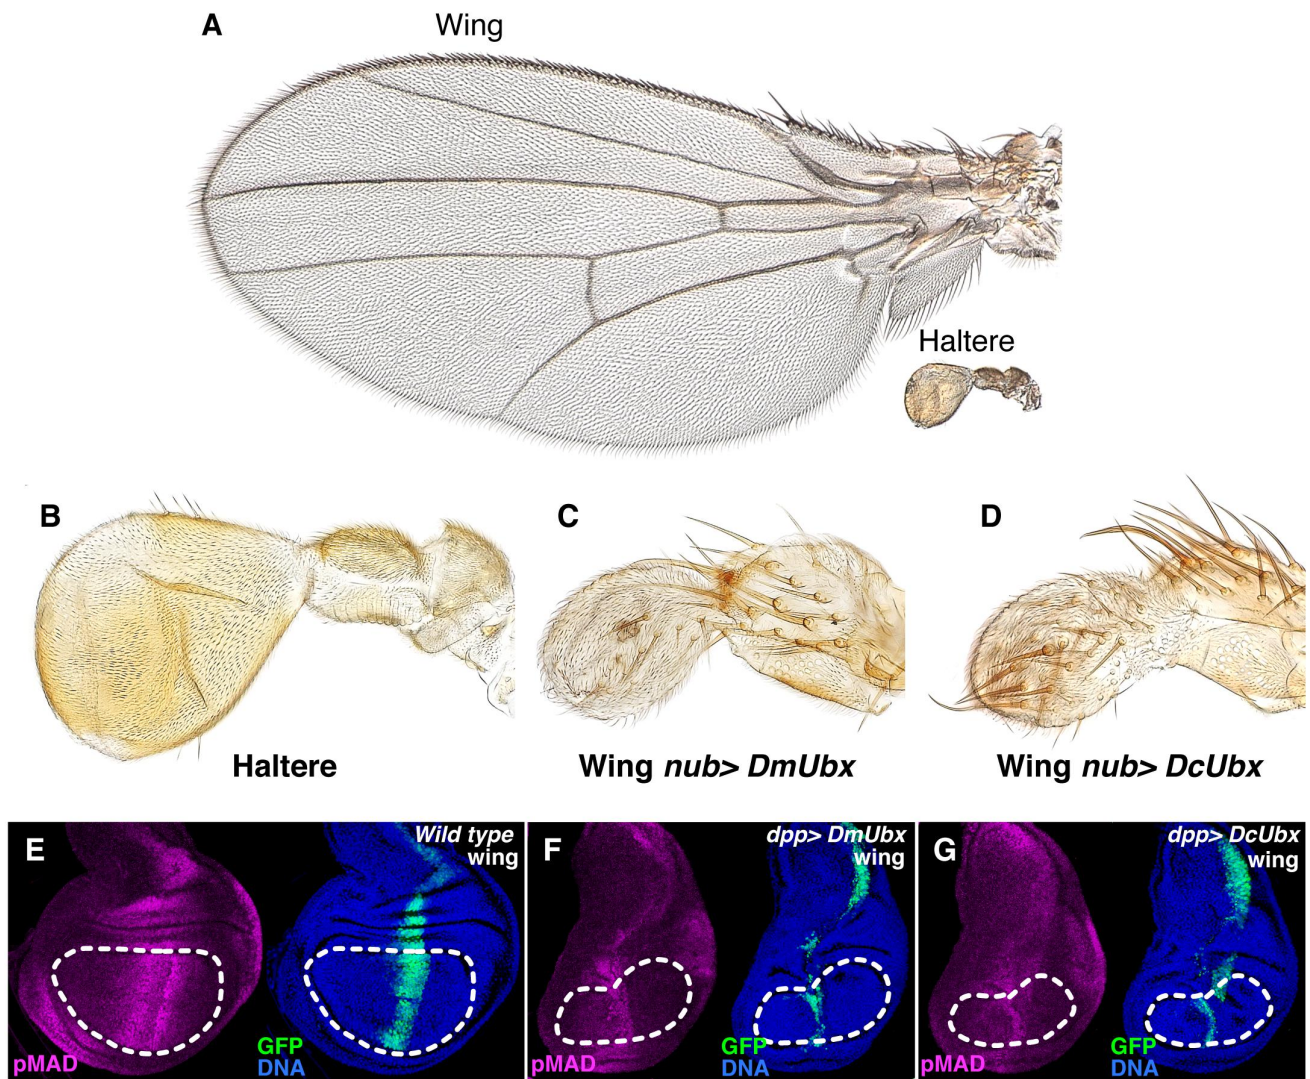

Parker *et al* Supplemental Figure S2

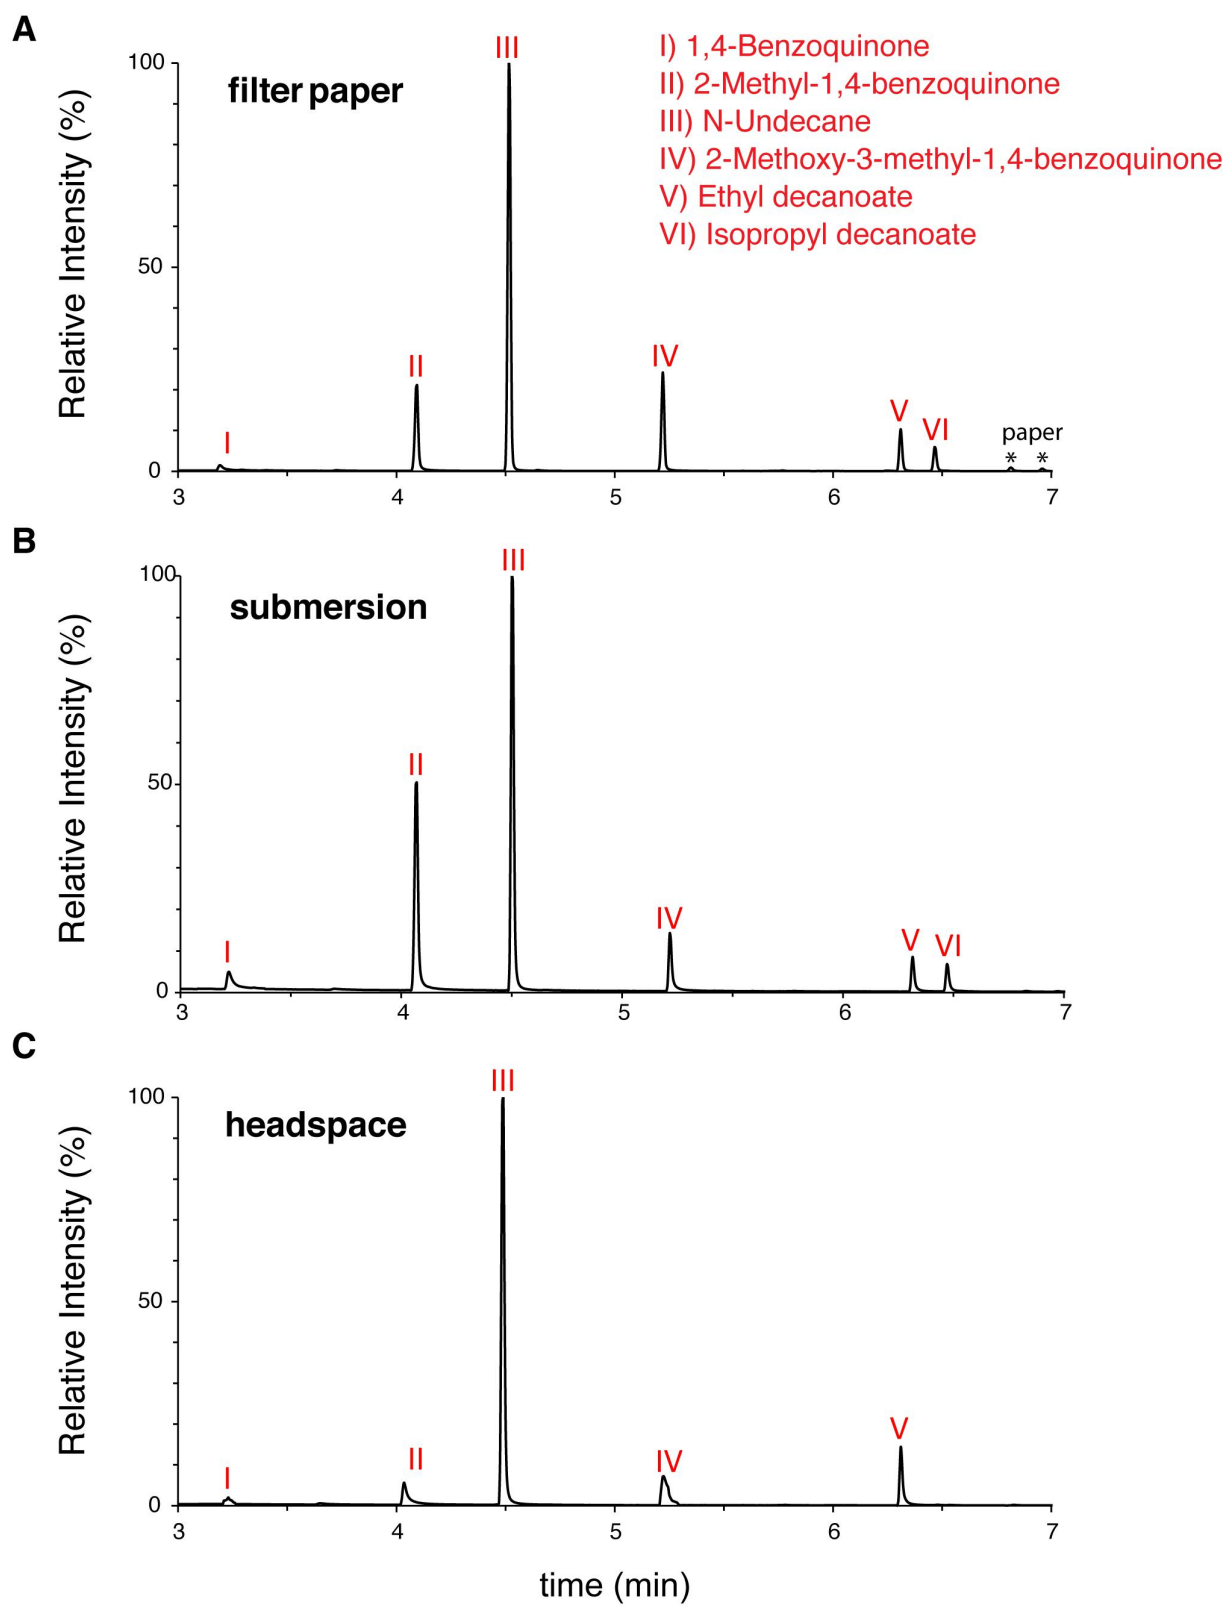

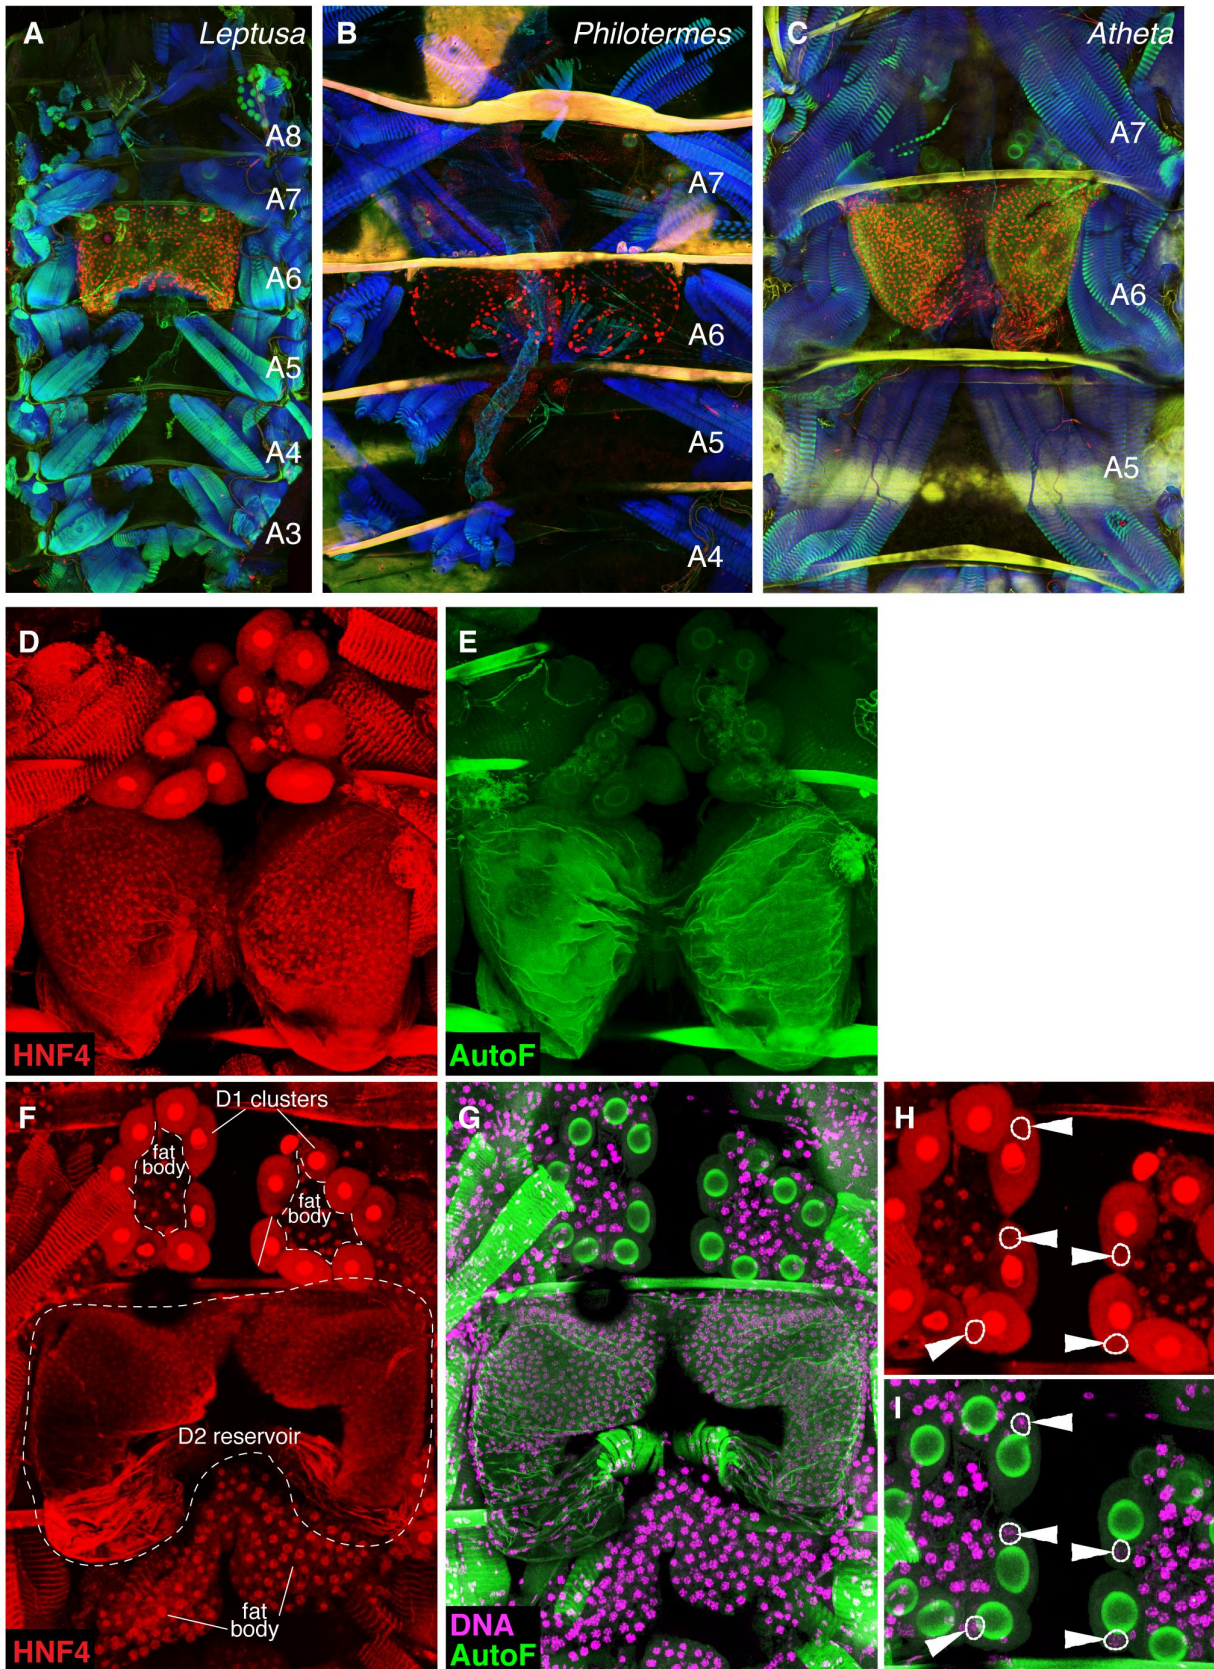

Parker *et al* Supplemental Figure S4

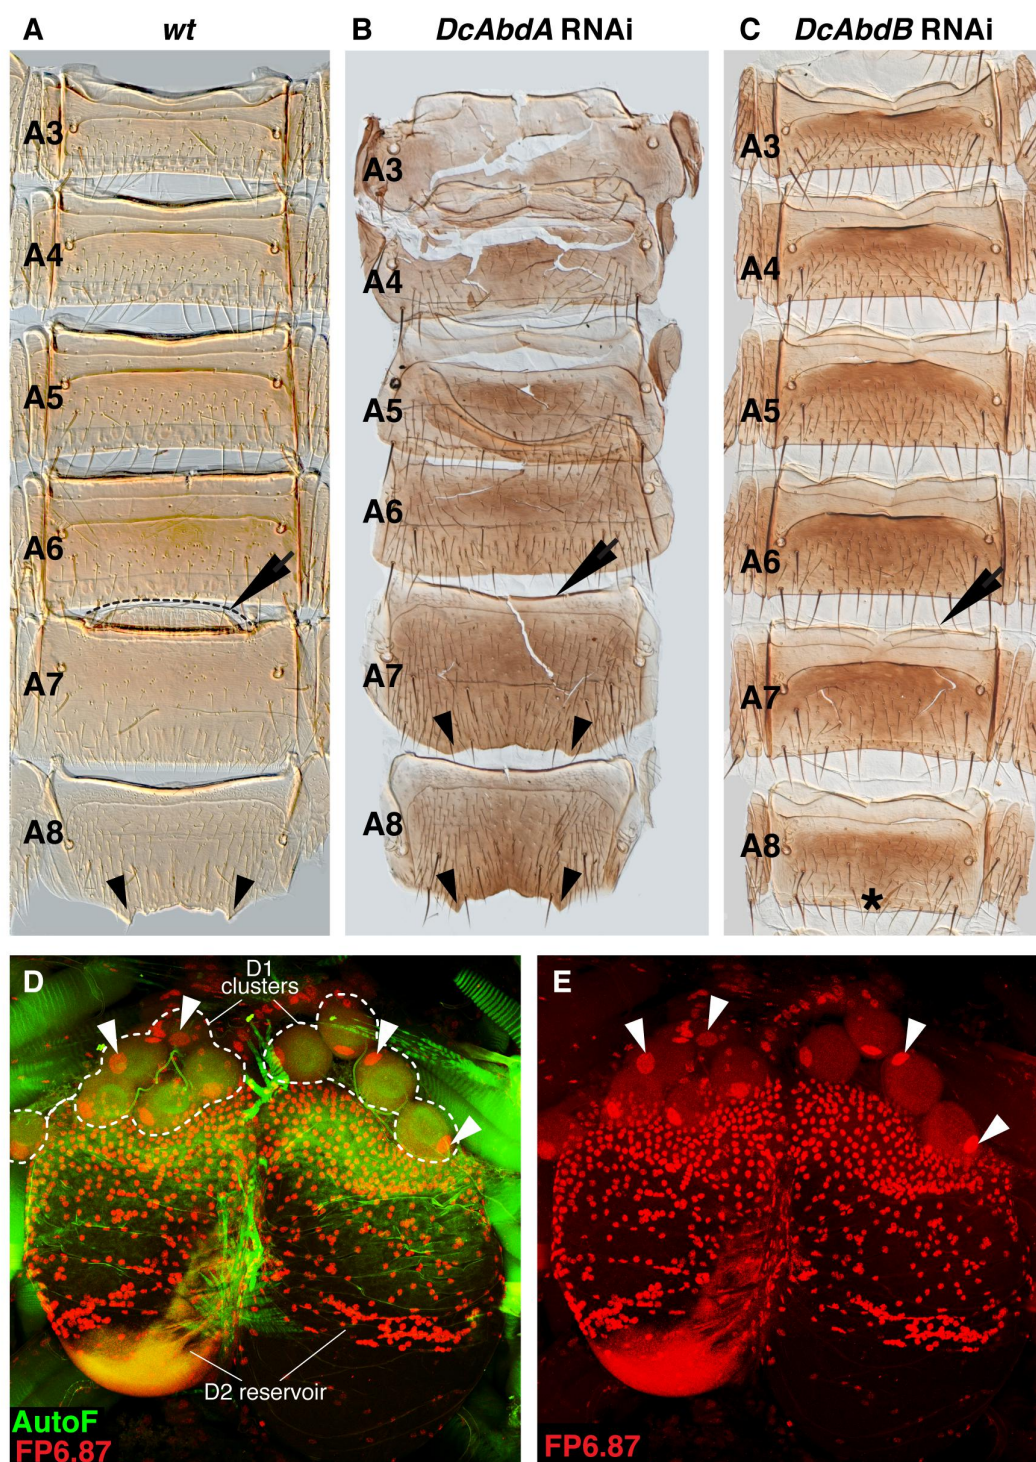

Parker *et al* Supplemental Figure S5

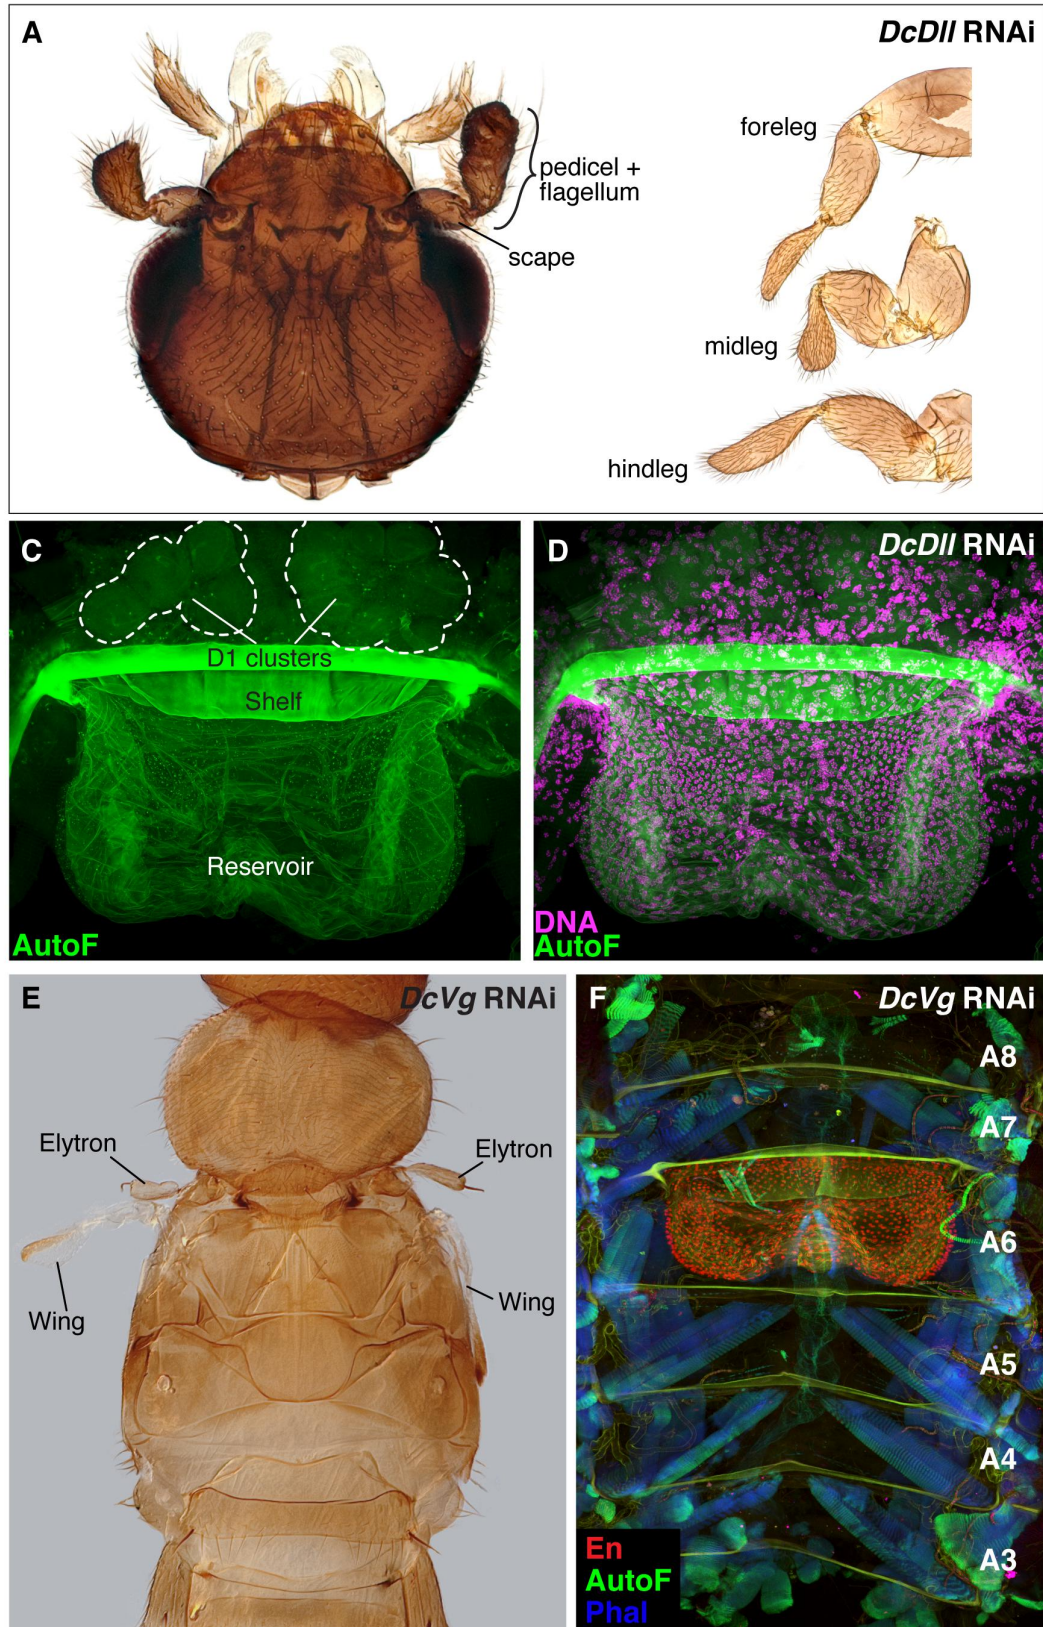

Parker *et al* Supplemental Figure S6
